# Supplementary material
Source: Research Square preprint supplement (doi:10.21203/rs.3.rs-9608818/v1)
Supplement: Supplementary file 2 [file 9261c6427840263012d81724.xlsx]

## Sheet: Sheet1
Species				Continental - response to forest disturbance									Northern latitudes - response to forest disturbance									Mid latitudes - response to forest disturbance									Southern latitudes - response to forest disturbance
				70-100% forest cover			30-70% forest cover			0-30% forest cover			70-100% forest cover			30-70% forest cover			0-30% forest cover			70-100% forest cover			30-70% forest cover			0-30% forest cover			70-100% forest cover			30-70% forest cover			0-30% forest cover
Scientific name	Common name	AVONET habitat density	Vegetation affiliation	<6 y.o. disturbances	6-11 y.o. Disturbances	12-17 y.o. Disturbances	<6 y.o. disturbances	6-11 y.o. Disturbances	12-17 y.o. Disturbances	<6 y.o. disturbances	6-11 y.o. Disturbances	12-17 y.o. Disturbances	<6 y.o. disturbances	6-11 y.o. Disturbances	12-17 y.o. Disturbances	<6 y.o. disturbances	6-11 y.o. Disturbances	12-17 y.o. Disturbances	<6 y.o. disturbances	6-11 y.o. Disturbances	12-17 y.o. Disturbances	<6 y.o. disturbances	6-11 y.o. Disturbances	12-17 y.o. Disturbances	<6 y.o. disturbances	6-11 y.o. Disturbances	12-17 y.o. Disturbances	<6 y.o. disturbances	6-11 y.o. Disturbances	12-17 y.o. Disturbances	<6 y.o. disturbances	6-11 y.o. Disturbances	12-17 y.o. Disturbances	<6 y.o. disturbances	6-11 y.o. Disturbances	12-17 y.o. Disturbances	<6 y.o. disturbances	6-11 y.o. Disturbances	12-17 y.o. Disturbances
Bombycilla garrulus	Bohemian Waxwing	dense	forest	0.076 (-0.264 - 0.415)	0.85 (-0.517 - 2.218)	0.489 (-0.234 - 1.211)	0.033 (-0.086 - 0.152)	0.272 (-0.046 - 0.589)	0.175 (-0.02 - 0.369)	0.007 (-0.004 - 0.019)	0.046 (0.015 - 0.077)	0.032 (0.01 - 0.054)	0.343 (-0.334 - 1.02)	1.168 (-0.615 - 2.95)	0.545 (-0.246 - 1.337)	0.186 (-0.092 - 0.465)	0.495 (-0.062 - 1.053)	0.274 (-0.031 - 0.578)	0.052 (0.004 - 0.1)	0.112 (0.024 - 0.2)	0.071 (0.014 - 0.129)	-1.765 (2.19 - -5.721)	-1.119 (-1.142 - -1.096)	-1.656 (1.697 - -5.01)	-1.05 (1.263 - -3.363)	-0.47 (-0.363 - -0.577)	-0.849 (0.738 - -2.436)	-0.514 (0.626 - -1.655)	-0.102 (0.127 - -0.332)	-0.244 (0.258 - -0.746)	NA	NA	NA	NA	NA	NA	NA	NA	NA
Bonasa bonasia	Hazel Grouse	dense	forest	-0.134 (-0.292 - 0.025)	-0.161 (-0.293 - -0.028)	0.064 (-0.221 - 0.348)	-0.056 (-0.123 - 0.011)	-0.069 (-0.128 - -0.01)	0.024 (-0.07 - 0.117)	-0.012 (-0.019 - -0.005)	-0.015 (-0.021 - -0.009)	0.005 (-0.005 - 0.014)	-0.048 (-0.227 - 0.13)	-0.208 (-0.222 - -0.194)	0.065 (-0.178 - 0.309)	-0.019 (-0.076 - 0.038)	-0.094 (-0.098 - -0.089)	0.025 (-0.047 - 0.096)	-0.004 (-0.008 - 0.001)	-0.022 (-0.017 - -0.026)	0.005 (-0.003 - 0.012)	NA	NA	NA	NA	NA	NA	NA	NA	NA	NA	NA	NA	NA	NA	NA	NA	NA	NA
Carduelis citrinella	Citril Finch	semi-open	forest	NA	NA	NA	NA	NA	NA	NA	NA	NA	NA	NA	NA	NA	NA	NA	NA	NA	NA	-0.175 (-0.273 - -0.076)	-0.195 (-0.269 - -0.121)	-0.096 (-0.609 - 0.416)	-0.146 (-0.262 - -0.029)	-0.168 (-0.28 - -0.055)	-0.073 (-0.475 - 0.328)	-0.063 (-0.077 - -0.049)	-0.075 (-0.09 - -0.06)	-0.029 (-0.118 - 0.061)	0.222 (-2.301 - 2.744)	31.672 (-139.187 - 202.531)	0.741 (-4.032 - 5.513)	0.069 (-0.57 - 0.707)	2.107 (-4.974 - 9.187)	0.178 (-0.662 - 1.018)	0.011 (-0.054 - 0.076)	0.094 (-0.062 - 0.25)	0.023 (-0.041 - 0.087)
Certhia brachydactyla	Short-toed Treecreeper	dense	forest	-0.288 (-0.381 - -0.194)	-0.263 (-0.35 - -0.175)	-0.248 (-0.334 - -0.162)	-0.134 (-0.184 - -0.084)	-0.121 (-0.167 - -0.075)	-0.114 (-0.158 - -0.07)	-0.032 (-0.039 - -0.024)	-0.029 (-0.035 - -0.022)	-0.027 (-0.033 - -0.021)	NA	NA	NA	NA	NA	NA	NA	NA	NA	-0.244 (-0.352 - -0.136)	0.125 (-0.135 - 0.386)	-0.057 (-0.234 - 0.119)	-0.122 (-0.179 - -0.065)	0.055 (-0.043 - 0.153)	-0.027 (-0.101 - 0.048)	-0.031 (-0.039 - -0.024)	0.012 (0 - 0.024)	-0.006 (-0.015 - 0.003)	-0.537 (-0.631 - -0.444)	-0.715 (-0.705 - -0.726)	-0.537 (-0.593 - -0.481)	-0.22 (-0.277 - -0.163)	-0.317 (-0.338 - -0.297)	-0.22 (-0.258 - -0.181)	-0.046 (-0.052 - -0.04)	-0.074 (-0.075 - -0.073)	-0.046 (-0.049 - -0.044)
Certhia familiaris	Eurasian Treecreeper	dense	forest	-0.507 (-0.514 - -0.5)	-0.488 (-0.502 - -0.473)	-0.426 (-0.465 - -0.387)	-0.22 (-0.231 - -0.209)	-0.209 (-0.222 - -0.196)	-0.176 (-0.196 - -0.156)	-0.05 (-0.049 - -0.051)	-0.046 (-0.046 - -0.047)	-0.037 (-0.038 - -0.037)	-0.25 (-0.285 - -0.216)	-0.281 (-0.302 - -0.26)	-0.101 (-0.222 - 0.02)	-0.123 (-0.14 - -0.106)	-0.141 (-0.154 - -0.128)	-0.045 (-0.093 - 0.002)	-0.031 (-0.03 - -0.032)	-0.036 (-0.034 - -0.039)	-0.01 (-0.015 - -0.006)	-0.592 (-0.591 - -0.593)	-0.543 (-0.569 - -0.516)	-0.573 (-0.574 - -0.571)	-0.262 (-0.281 - -0.243)	-0.231 (-0.258 - -0.204)	-0.249 (-0.266 - -0.233)	-0.062 (-0.064 - -0.059)	-0.051 (-0.055 - -0.048)	-0.057 (-0.059 - -0.056)	8445.978 (-99695.61 - 116587.567)	-0.307 (-0.041 - -0.573)	-0.299 (-0.139 - -0.459)	72.784 (-477.627 - 623.194)	-0.178 (-0.068 - -0.289)	-0.157 (-0.211 - -0.104)	0.527 (-0.898 - 1.951)	-0.1 (-0.036 - -0.165)	-0.049 (-0.11 - 0.012)
Coccothraustes coccothraustes	Hawfinch	dense	forest	-0.316 (-0.374 - -0.258)	-0.182 (-0.304 - -0.06)	-0.341 (-0.373 - -0.31)	-0.156 (-0.199 - -0.113)	-0.081 (-0.142 - -0.021)	-0.172 (-0.202 - -0.143)	-0.04 (-0.049 - -0.031)	-0.019 (-0.028 - -0.009)	-0.045 (-0.051 - -0.04)	-0.154 (-0.291 - -0.017)	-0.044 (-0.355 - 0.268)	-0.193 (-0.272 - -0.113)	-0.117 (-0.259 - 0.024)	-0.03 (-0.253 - 0.194)	-0.154 (-0.265 - -0.043)	-0.046 (-0.087 - -0.005)	-0.01 (-0.065 - 0.045)	-0.064 (-0.1 - -0.028)	-0.287 (-0.402 - -0.172)	-0.06 (-0.289 - 0.168)	-0.339 (-0.399 - -0.278)	-0.128 (-0.193 - -0.063)	-0.024 (-0.115 - 0.067)	-0.157 (-0.2 - -0.115)	-0.029 (-0.041 - -0.018)	-0.005 (-0.017 - 0.007)	-0.038 (-0.046 - -0.03)	NA	NA	NA	NA	NA	NA	NA	NA	NA
Columba oenas	Stock Dove	open	forest	-0.116 (-0.188 - -0.043)	0.053 (-0.136 - 0.242)	0.118 (-0.11 - 0.346)	-0.071 (-0.123 - -0.019)	0.028 (-0.064 - 0.12)	0.06 (-0.042 - 0.162)	-0.022 (-0.035 - -0.01)	0.008 (-0.009 - 0.024)	0.015 (-0.002 - 0.033)	-0.201 (-0.168 - -0.234)	-0.194 (-0.173 - -0.215)	0.302 (-0.47 - 1.074)	-0.191 (-0.206 - -0.176)	-0.18 (-0.207 - -0.154)	0.173 (-0.193 - 0.539)	-0.098 (-0.103 - -0.093)	-0.089 (-0.098 - -0.08)	0.051 (-0.017 - 0.119)	-0.017 (-0.19 - 0.157)	0.41 (-0.101 - 0.921)	0.167 (-0.152 - 0.486)	-0.009 (-0.105 - 0.086)	0.182 (-0.003 - 0.367)	0.083 (-0.056 - 0.221)	-0.003 (-0.023 - 0.017)	0.042 (0.015 - 0.069)	0.021 (-0.003 - 0.045)	-0.026 (-0.237 - 0.185)	0.034 (-0.303 - 0.372)	0.056 (-0.252 - 0.363)	-0.021 (-0.211 - 0.169)	0.024 (-0.187 - 0.235)	0.037 (-0.139 - 0.213)	-0.009 (-0.081 - 0.064)	0.008 (-0.046 - 0.063)	0.013 (-0.027 - 0.052)
Dendrocopos leucotos	White-backed Woodpecker	dense	forest	NA	NA	NA	NA	NA	NA	NA	NA	NA	-0.214 (-1.605 - 1.177)	-0.542 (-0.182 - -0.902)	165.313 (-724.606 - 1055.233)	-0.094 (-0.818 - 0.629)	-0.354 (-0.253 - -0.455)	10.387 (-23.917 - 44.691)	-0.021 (-0.16 - 0.117)	-0.15 (-0.145 - -0.155)	0.444 (-0.224 - 1.111)	NA	NA	NA	NA	NA	NA	NA	NA	NA	NA	NA	NA	NA	NA	NA	NA	NA	NA
Dryobates minor	Lesser Spotted Woodpecker	dense	forest	NA	NA	NA	NA	NA	NA	NA	NA	NA	NA	NA	NA	NA	NA	NA	NA	NA	NA	NA	NA	NA	NA	NA	NA	NA	NA	NA	NA	NA	NA	NA	NA	NA	NA	NA	NA
Dryocopus martius	Black Woodpecker	dense	forest	0.098 (-0.158 - 0.353)	-0.041 (-0.229 - 0.146)	-0.053 (-0.231 - 0.124)	0.035 (-0.041 - 0.11)	-0.015 (-0.074 - 0.043)	-0.02 (-0.075 - 0.036)	0.006 (0 - 0.013)	-0.003 (-0.008 - 0.002)	-0.004 (-0.008 - 0.001)	0.166 (-0.089 - 0.421)	0.541 (0.047 - 1.035)	0.725 (0.149 - 1.3)	0.069 (-0.013 - 0.151)	0.204 (0.056 - 0.351)	0.263 (0.096 - 0.429)	0.015 (0.004 - 0.025)	0.039 (0.019 - 0.06)	0.049 (0.026 - 0.072)	0.129 (-0.314 - 0.572)	-0.311 (-0.491 - -0.131)	-0.399 (-0.538 - -0.26)	0.044 (-0.09 - 0.177)	-0.119 (-0.19 - -0.048)	-0.158 (-0.218 - -0.097)	0.008 (-0.006 - 0.021)	-0.023 (-0.031 - -0.015)	-0.032 (-0.039 - -0.025)	0.756 (-4.339 - 5.851)	4.178 (-11.584 - 19.939)	1.031 (-4.268 - 6.329)	0.232 (-1.032 - 1.497)	0.864 (-1.43 - 3.159)	0.3 (-0.906 - 1.505)	0.037 (-0.084 - 0.158)	0.098 (-0.05 - 0.246)	0.045 (-0.061 - 0.151)
Emberiza rustica	Rustic Bunting	semi-open	forest	0.252 (-0.196 - 0.701)	-0.093 (-0.093 - -0.093)	0.051 (-0.099 - 0.201)	0.087 (-0.034 - 0.208)	-0.045 (-0.04 - -0.05)	0.02 (-0.026 - 0.066)	0.015 (0 - 0.031)	-0.011 (-0.005 - -0.017)	0.004 (-0.002 - 0.01)	0.166 (-0.181 - 0.513)	-0.111 (-0.078 - -0.145)	0.055 (-0.103 - 0.214)	0.058 (-0.037 - 0.153)	-0.052 (-0.032 - -0.072)	0.021 (-0.025 - 0.067)	0.01 (-0.002 - 0.023)	-0.013 (-0.003 - -0.022)	0.004 (-0.002 - 0.01)	NA	NA	NA	NA	NA	NA	NA	NA	NA	NA	NA	NA	NA	NA	NA	NA	NA	NA
Ficedula albicollis	Collared Flycatcher	dense	forest	-0.08 (-0.798 - 0.639)	-0.416 (-0.471 - -0.361)	-0.498 (-0.39 - -0.607)	-0.023 (-0.24 - 0.193)	-0.154 (-0.22 - -0.089)	-0.219 (-0.212 - -0.226)	-0.003 (-0.026 - 0.019)	-0.03 (-0.042 - -0.018)	-0.058 (-0.061 - -0.054)	NA	NA	NA	NA	NA	NA	NA	NA	NA	NA	NA	NA	NA	NA	NA	NA	NA	NA	NA	NA	NA	NA	NA	NA	NA	NA	NA
Ficedula hypoleuca	European Pied Flycatcher	dense	forest	-0.068 (-0.191 - 0.055)	-0.12 (-0.22 - -0.02)	-0.149 (-0.23 - -0.068)	-0.029 (-0.077 - 0.02)	-0.052 (-0.094 - -0.01)	-0.065 (-0.1 - -0.03)	-0.006 (-0.011 - -0.001)	-0.011 (-0.016 - -0.007)	-0.015 (-0.018 - -0.011)	0.037 (-0.093 - 0.167)	-0.096 (-0.184 - -0.008)	-0.12 (-0.19 - -0.049)	0.023 (-0.045 - 0.091)	-0.064 (-0.115 - -0.013)	-0.08 (-0.122 - -0.039)	0.008 (-0.003 - 0.018)	-0.022 (-0.028 - -0.016)	-0.028 (-0.031 - -0.024)	-0.2 (-0.352 - -0.048)	-0.196 (-0.342 - -0.05)	-0.223 (-0.342 - -0.104)	-0.083 (-0.161 - -0.006)	-0.082 (-0.156 - -0.008)	-0.095 (-0.16 - -0.03)	-0.018 (-0.031 - -0.004)	-0.017 (-0.03 - -0.005)	-0.021 (-0.032 - -0.009)	NA	NA	NA	NA	NA	NA	NA	NA	NA
Ficedula parva	Red-breasted Flycatcher	dense	forest	-0.462 (-0.363 - -0.562)	-0.24 (-0.551 - 0.07)	-0.12 (-0.652 - 0.413)	-0.258 (-0.234 - -0.282)	-0.097 (-0.249 - 0.055)	-0.045 (-0.255 - 0.165)	-0.088 (-0.083 - -0.093)	-0.02 (-0.043 - 0.002)	-0.009 (-0.036 - 0.019)	NA	NA	NA	NA	NA	NA	NA	NA	NA	-0.404 (-0.255 - -0.554)	1.736 (-4.564 - 8.036)	-0.387 (-0.3 - -0.474)	-0.202 (-0.149 - -0.254)	0.341 (-0.581 - 1.263)	-0.172 (-0.182 - -0.163)	-0.074 (-0.061 - -0.086)	0.035 (-0.02 - 0.091)	-0.044 (-0.051 - -0.037)	NA	NA	NA	NA	NA	NA	NA	NA	NA
Garrulus glandarius	Eurasian Jay	dense	forest	-0.495 (-0.535 - -0.455)	-0.543 (-0.563 - -0.522)	-0.232 (-0.32 - -0.144)	-0.204 (-0.219 - -0.189)	-0.227 (-0.236 - -0.219)	-0.089 (-0.116 - -0.062)	-0.043 (-0.043 - -0.044)	-0.049 (-0.047 - -0.05)	-0.017 (-0.019 - -0.016)	0.108 (-0.072 - 0.287)	-0.071 (-0.104 - -0.038)	0.176 (-0.057 - 0.409)	0.045 (-0.014 - 0.104)	-0.032 (-0.036 - -0.028)	0.071 (-0.006 - 0.149)	0.009 (0 - 0.018)	-0.007 (-0.005 - -0.01)	0.015 (0.002 - 0.027)	-0.612 (-0.695 - -0.529)	-0.602 (-0.672 - -0.532)	-0.189 (-0.38 - 0.001)	-0.249 (-0.288 - -0.21)	-0.244 (-0.277 - -0.212)	-0.069 (-0.131 - -0.007)	-0.052 (-0.056 - -0.049)	-0.051 (-0.053 - -0.049)	-0.013 (-0.018 - -0.007)	-0.609 (-0.72 - -0.499)	-0.547 (-0.659 - -0.434)	-0.262 (-0.436 - -0.089)	-0.234 (-0.291 - -0.176)	-0.206 (-0.26 - -0.152)	-0.093 (-0.156 - -0.03)	-0.046 (-0.051 - -0.041)	-0.04 (-0.044 - -0.035)	-0.017 (-0.022 - -0.012)
Glaucidium passerinum	Eurasian Pygmy-owl	dense	forest	NA	NA	NA	NA	NA	NA	NA	NA	NA	NA	NA	NA	NA	NA	NA	NA	NA	NA	NA	NA	NA	NA	NA	NA	NA	NA	NA	NA	NA	NA	NA	NA	NA	NA	NA	NA
Leiopicus medius	Middle Spotted Woodpecker	dense	forest	-0.529 (-0.474 - -0.584)	-0.368 (-0.495 - -0.241)	-0.321 (-0.465 - -0.177)	-0.289 (-0.291 - -0.288)	-0.16 (-0.242 - -0.077)	-0.134 (-0.215 - -0.054)	-0.093 (-0.101 - -0.085)	-0.036 (-0.052 - -0.02)	-0.029 (-0.042 - -0.016)	8.66 (-67.019 - 84.338)	85.103 (-735.753 - 905.959)	-0.579 (-0.238 - -0.921)	1.25 (-6.227 - 8.727)	5.465 (-27.271 - 38.201)	-0.278 (-0.308 - -0.249)	0.101 (-0.24 - 0.442)	0.227 (-0.415 - 0.869)	-0.081 (-0.138 - -0.023)	-0.523 (-0.461 - -0.585)	-0.352 (-0.5 - -0.205)	-0.285 (-0.466 - -0.104)	-0.301 (-0.295 - -0.308)	-0.155 (-0.25 - -0.059)	-0.119 (-0.216 - -0.022)	-0.109 (-0.116 - -0.101)	-0.035 (-0.054 - -0.016)	-0.026 (-0.041 - -0.01)	NA	NA	NA	NA	NA	NA	NA	NA	NA
Lophophanes cristatus	Crested Tit	dense	forest	-0.22 (-0.287 - -0.154)	-0.191 (-0.264 - -0.118)	-0.128 (-0.214 - -0.041)	-0.074 (-0.097 - -0.051)	-0.063 (-0.088 - -0.039)	-0.041 (-0.068 - -0.014)	-0.013 (-0.014 - -0.011)	-0.011 (-0.012 - -0.009)	-0.007 (-0.009 - -0.005)	0.059 (-0.112 - 0.23)	-0.153 (-0.202 - -0.104)	0.021 (-0.121 - 0.162)	0.02 (-0.025 - 0.064)	-0.057 (-0.07 - -0.044)	0.007 (-0.03 - 0.044)	0.003 (-0.001 - 0.008)	-0.011 (-0.01 - -0.011)	0.001 (-0.002 - 0.005)	-0.299 (-0.37 - -0.228)	-0.186 (-0.299 - -0.072)	-0.029 (-0.204 - 0.146)	-0.095 (-0.123 - -0.068)	-0.056 (-0.091 - -0.02)	-0.008 (-0.055 - 0.038)	-0.016 (-0.018 - -0.014)	-0.009 (-0.011 - -0.006)	-0.001 (-0.005 - 0.002)	-0.204 (-0.341 - -0.068)	-0.18 (-0.308 - -0.053)	-0.278 (-0.347 - -0.209)	-0.084 (-0.141 - -0.027)	-0.073 (-0.125 - -0.022)	-0.119 (-0.153 - -0.084)	-0.018 (-0.022 - -0.014)	-0.015 (-0.019 - -0.012)	-0.026 (-0.027 - -0.025)
Loxia curvirostra	Red Crossbill	dense	forest	-0.178 (-0.239 - -0.118)	-0.044 (-0.172 - 0.084)	0.513 (0.121 - 0.904)	-0.072 (-0.1 - -0.043)	-0.016 (-0.061 - 0.029)	0.147 (0.058 - 0.237)	-0.015 (-0.018 - -0.011)	-0.003 (-0.008 - 0.002)	0.022 (0.014 - 0.029)	0.048 (-0.183 - 0.279)	0.137 (-0.16 - 0.434)	0.246 (-0.088 - 0.58)	0.019 (-0.06 - 0.099)	0.053 (-0.043 - 0.149)	0.09 (-0.01 - 0.191)	0.004 (-0.005 - 0.013)	0.01 (0 - 0.021)	0.017 (0.006 - 0.028)	-0.286 (-0.281 - -0.29)	-0.138 (-0.256 - -0.019)	0.997 (-0.02 - 2.014)	-0.138 (-0.152 - -0.124)	-0.054 (-0.107 - -0.001)	0.25 (0.056 - 0.444)	-0.036 (-0.039 - -0.032)	-0.011 (-0.018 - -0.004)	0.033 (0.018 - 0.047)	NA	NA	NA	NA	NA	NA	NA	NA	NA
Loxia leucoptera	Two-barred Crossbill	dense	forest	0.098 (-0.71 - 0.907)	-0.092 (-0.286 - 0.101)	-0.136 (-0.173 - -0.099)	0.045 (-0.269 - 0.36)	-0.054 (-0.18 - 0.073)	-0.089 (-0.134 - -0.043)	0.011 (-0.029 - 0.05)	-0.016 (-0.037 - 0.005)	-0.03 (-0.035 - -0.026)	0.081 (-0.607 - 0.768)	0.01 (-0.447 - 0.468)	-0.138 (-0.127 - -0.148)	0.038 (-0.229 - 0.305)	0.005 (-0.198 - 0.208)	-0.098 (-0.1 - -0.097)	0.009 (-0.021 - 0.039)	0.001 (-0.023 - 0.025)	-0.038 (-0.023 - -0.053)	-0.276 (-0.237 - -0.315)	-0.29 (-0.091 - -0.49)	3.278 (-30.237 - 36.793)	-0.154 (-0.253 - -0.055)	-0.185 (-0.08 - -0.291)	0.628 (-3.818 - 5.073)	-0.049 (-0.105 - 0.007)	-0.097 (-0.057 - -0.137)	0.066 (-0.188 - 0.321)	NA	NA	NA	NA	NA	NA	NA	NA	NA
Loxia pytyopsittacus	Parrot Crossbill	dense	forest	1.087 (-0.488 - 2.662)	-0.096 (-0.161 - -0.031)	0.155 (-0.219 - 0.528)	0.35 (-0.015 - 0.715)	-0.061 (-0.11 - -0.012)	0.072 (-0.073 - 0.218)	0.061 (0.024 - 0.097)	-0.02 (-0.028 - -0.012)	0.017 (-0.003 - 0.037)	0.961 (-0.479 - 2.401)	-0.118 (-0.162 - -0.075)	0.111 (-0.22 - 0.443)	0.318 (-0.031 - 0.667)	-0.077 (-0.115 - -0.038)	0.053 (-0.081 - 0.188)	0.056 (0.019 - 0.093)	-0.026 (-0.03 - -0.021)	0.013 (-0.006 - 0.032)	-0.005 (-1.007 - 0.997)	0.012 (-1.101 - 1.125)	0.258 (-2.329 - 2.846)	-0.003 (-0.598 - 0.592)	0.007 (-0.623 - 0.637)	0.121 (-0.867 - 1.11)	-0.001 (-0.134 - 0.133)	0.002 (-0.135 - 0.139)	0.029 (-0.122 - 0.181)	NA	NA	NA	NA	NA	NA	NA	NA	NA
Nucifraga caryocatactes	Northern Nutcracker	dense	forest	-0.28 (-0.3 - -0.259)	-0.097 (-0.28 - 0.087)	-0.13 (-0.295 - 0.035)	-0.168 (-0.205 - -0.13)	-0.047 (-0.142 - 0.048)	-0.065 (-0.157 - 0.026)	-0.053 (-0.057 - -0.049)	-0.012 (-0.024 - 0)	-0.017 (-0.029 - -0.005)	NA	NA	NA	NA	NA	NA	NA	NA	NA	-0.3 (-0.281 - -0.319)	0.009 (-0.275 - 0.294)	-0.114 (-0.306 - 0.079)	-0.204 (-0.226 - -0.182)	0.004 (-0.127 - 0.136)	-0.059 (-0.171 - 0.053)	-0.077 (-0.078 - -0.075)	0.001 (-0.015 - 0.017)	-0.016 (-0.03 - -0.001)	NA	NA	NA	NA	NA	NA	NA	NA	NA
Periparus ater	Coal Tit	dense	forest	-0.533 (-0.507 - -0.56)	-0.313 (-0.348 - -0.279)	-0.14 (-0.221 - -0.059)	-0.172 (-0.166 - -0.178)	-0.091 (-0.099 - -0.082)	-0.038 (-0.056 - -0.02)	-0.029 (-0.027 - -0.031)	-0.013 (-0.013 - -0.014)	-0.005 (-0.006 - -0.005)	-0.147 (-0.115 - -0.179)	-0.197 (-0.126 - -0.268)	0.097 (-0.069 - 0.262)	-0.069 (-0.048 - -0.089)	-0.096 (-0.059 - -0.134)	0.039 (-0.014 - 0.093)	-0.016 (-0.009 - -0.024)	-0.024 (-0.012 - -0.036)	0.008 (0 - 0.016)	-0.839 (-0.735 - -0.943)	-0.301 (-0.384 - -0.219)	-0.364 (-0.423 - -0.305)	-0.255 (-0.228 - -0.283)	-0.076 (-0.091 - -0.061)	-0.094 (-0.104 - -0.083)	-0.041 (-0.035 - -0.047)	-0.01 (-0.01 - -0.01)	-0.012 (-0.012 - -0.013)	-0.191 (-0.23 - -0.151)	-0.141 (-0.208 - -0.074)	-0.098 (-0.196 - 0.001)	-0.071 (-0.097 - -0.045)	-0.049 (-0.08 - -0.019)	-0.033 (-0.07 - 0.004)	-0.014 (-0.016 - -0.012)	-0.009 (-0.011 - -0.007)	-0.006 (-0.008 - -0.003)
Perisoreus infaustus	Siberian Jay	dense	forest	-0.514 (-0.41 - -0.619)	-0.479 (-0.421 - -0.536)	-0.421 (-0.413 - -0.429)	-0.312 (-0.261 - -0.363)	-0.266 (-0.25 - -0.281)	-0.215 (-0.221 - -0.209)	-0.112 (-0.086 - -0.139)	-0.081 (-0.066 - -0.096)	-0.058 (-0.048 - -0.067)	-0.396 (-0.309 - -0.482)	-0.362 (-0.325 - -0.399)	-0.286 (-0.32 - -0.251)	-0.288 (-0.223 - -0.353)	-0.244 (-0.22 - -0.268)	-0.173 (-0.186 - -0.161)	-0.118 (-0.065 - -0.171)	-0.088 (-0.054 - -0.123)	-0.054 (-0.036 - -0.072)	-0.947 (-0.685 - -1.209)	-0.583 (-1.304 - 0.138)	-0.678 (-1.064 - -0.292)	-0.423 (-0.365 - -0.481)	-0.194 (-0.489 - 0.102)	-0.235 (-0.428 - -0.042)	-0.118 (-0.11 - -0.126)	-0.033 (-0.064 - -0.002)	-0.042 (-0.061 - -0.023)	NA	NA	NA	NA	NA	NA	NA	NA	NA
Phoenicurus phoenicurus	Common Redstart	dense	forest	0.155 (0.018 - 0.292)	0.2 (0.057 - 0.343)	-0.038 (-0.091 - 0.014)	0.067 (0.021 - 0.114)	0.085 (0.038 - 0.132)	-0.018 (-0.038 - 0.001)	0.015 (0.01 - 0.02)	0.019 (0.013 - 0.024)	-0.005 (-0.006 - -0.003)	-0.078 (-0.111 - -0.044)	-0.052 (-0.102 - -0.002)	-0.111 (-0.115 - -0.107)	-0.035 (-0.044 - -0.027)	-0.023 (-0.038 - -0.008)	-0.052 (-0.049 - -0.054)	-0.008 (-0.007 - -0.009)	-0.005 (-0.006 - -0.005)	-0.012 (-0.009 - -0.015)	0.712 (0.23 - 1.193)	0.731 (0.295 - 1.167)	0.199 (-0.025 - 0.424)	0.256 (0.118 - 0.394)	0.261 (0.138 - 0.385)	0.083 (0 - 0.165)	0.047 (0.032 - 0.063)	0.048 (0.035 - 0.062)	0.018 (0.007 - 0.028)	-0.274 (-0.314 - -0.235)	-0.302 (-0.25 - -0.354)	-0.023 (-0.633 - 0.587)	-0.187 (-0.288 - -0.086)	-0.225 (-0.251 - -0.199)	-0.012 (-0.323 - 0.299)	-0.069 (-0.119 - -0.018)	-0.095 (-0.127 - -0.063)	-0.003 (-0.063 - 0.057)
Phylloscopus bonelli	Western Bonelli's Warbler	semi-open	forest	-0.324 (-0.278 - -0.371)	-0.274 (-0.247 - -0.301)	-0.225 (-0.215 - -0.236)	-0.148 (-0.133 - -0.163)	-0.118 (-0.11 - -0.126)	-0.092 (-0.09 - -0.095)	-0.036 (-0.03 - -0.041)	-0.026 (-0.022 - -0.03)	-0.019 (-0.017 - -0.022)	NA	NA	NA	NA	NA	NA	NA	NA	NA	-0.176 (-0.178 - -0.173)	1.098 (-0.134 - 2.331)	0.493 (-0.151 - 1.138)	-0.099 (-0.117 - -0.082)	0.309 (0.056 - 0.562)	0.165 (-0.003 - 0.332)	-0.029 (-0.03 - -0.028)	0.046 (0.024 - 0.068)	0.029 (0.012 - 0.045)	-0.63 (-0.55 - -0.71)	-0.611 (-0.537 - -0.685)	-0.527 (-0.486 - -0.569)	-0.26 (-0.25 - -0.269)	-0.247 (-0.24 - -0.255)	-0.2 (-0.202 - -0.198)	-0.057 (-0.052 - -0.062)	-0.053 (-0.049 - -0.058)	-0.04 (-0.037 - -0.043)
Phylloscopus collybita	Common Chiffchaff	dense	forest	-0.362 (-0.362 - -0.363)	-0.352 (-0.343 - -0.36)	-0.083 (-0.128 - -0.037)	-0.159 (-0.155 - -0.163)	-0.154 (-0.146 - -0.161)	-0.033 (-0.045 - -0.022)	-0.036 (-0.032 - -0.039)	-0.034 (-0.031 - -0.038)	-0.007 (-0.007 - -0.007)	-0.268 (-0.164 - -0.372)	-0.284 (-0.17 - -0.398)	0.105 (-0.008 - 0.219)	-0.126 (-0.076 - -0.177)	-0.136 (-0.081 - -0.192)	0.039 (0.005 - 0.073)	-0.031 (-0.017 - -0.045)	-0.034 (-0.018 - -0.05)	0.007 (0.003 - 0.012)	-0.36 (-0.45 - -0.271)	-0.178 (-0.277 - -0.079)	0.054 (-0.089 - 0.198)	-0.148 (-0.179 - -0.118)	-0.071 (-0.101 - -0.04)	0.021 (-0.021 - 0.062)	-0.031 (-0.032 - -0.03)	-0.014 (-0.016 - -0.013)	0.004 (0.001 - 0.007)	-0.561 (-0.539 - -0.584)	-0.567 (-0.533 - -0.602)	-0.551 (-0.523 - -0.578)	-0.208 (-0.221 - -0.195)	-0.211 (-0.218 - -0.204)	-0.202 (-0.21 - -0.194)	-0.041 (-0.04 - -0.041)	-0.042 (-0.04 - -0.043)	-0.039 (-0.038 - -0.04)
Phylloscopus ibericus	Iberian Chiffchaff	semi-open	forest	-0.731 (-0.514 - -0.947)	-0.588 (-0.521 - -0.655)	0.293 (-0.736 - 1.323)	-0.391 (-0.355 - -0.427)	-0.264 (-0.299 - -0.229)	0.095 (-0.215 - 0.405)	-0.123 (-0.114 - -0.133)	-0.062 (-0.064 - -0.06)	0.016 (-0.015 - 0.047)	NA	NA	NA	NA	NA	NA	NA	NA	NA	-0.956 (-0.61 - -1.302)	-0.725 (-0.634 - -0.815)	0.57 (-1.073 - 2.212)	-0.719 (-0.602 - -0.836)	-0.438 (-0.499 - -0.376)	0.247 (-0.399 - 0.892)	-0.329 (-0.248 - -0.41)	-0.138 (-0.127 - -0.15)	0.055 (-0.031 - 0.14)	-0.414 (-0.274 - -0.553)	-0.429 (-0.206 - -0.653)	-0.316 (-0.414 - -0.217)	-0.228 (-0.275 - -0.181)	-0.252 (-0.215 - -0.288)	-0.147 (-0.276 - -0.017)	-0.071 (-0.112 - -0.03)	-0.09 (-0.099 - -0.08)	-0.036 (-0.066 - -0.005)
Phylloscopus sibilatrix	Wood Warbler	dense	forest	-0.486 (-0.481 - -0.491)	-0.311 (-0.384 - -0.239)	-0.478 (-0.475 - -0.48)	-0.185 (-0.193 - -0.178)	-0.105 (-0.134 - -0.076)	-0.181 (-0.189 - -0.173)	-0.037 (-0.037 - -0.037)	-0.018 (-0.021 - -0.016)	-0.036 (-0.036 - -0.036)	-0.363 (-0.314 - -0.412)	-0.175 (-0.233 - -0.116)	-0.39 (-0.327 - -0.453)	-0.196 (-0.176 - -0.216)	-0.079 (-0.104 - -0.054)	-0.22 (-0.191 - -0.248)	-0.056 (-0.046 - -0.066)	-0.018 (-0.019 - -0.018)	-0.067 (-0.054 - -0.079)	-0.443 (-0.507 - -0.379)	-0.416 (-0.493 - -0.338)	-0.459 (-0.506 - -0.412)	-0.148 (-0.182 - -0.114)	-0.136 (-0.173 - -0.1)	-0.155 (-0.183 - -0.127)	-0.026 (-0.03 - -0.022)	-0.023 (-0.027 - -0.019)	-0.027 (-0.031 - -0.024)	-0.191 (0.006 - -0.388)	3639.926 (-65941.976 - 73221.827)	-0.191 (0 - -0.381)	-0.177 (-0.049 - -0.304)	58.061 (-598.671 - 714.793)	-0.172 (-0.089 - -0.256)	-0.153 (-0.054 - -0.252)	0.768 (-2.38 - 3.916)	-0.11 (-0.14 - -0.079)
Phylloscopus trochiloides	Greenish Warbler	dense	forest	-0.51 (-0.347 - -0.673)	-0.455 (-0.404 - -0.506)	1.884 (-1.243 - 5.011)	-0.286 (-0.216 - -0.355)	-0.21 (-0.232 - -0.189)	0.428 (-0.103 - 0.958)	-0.121 (-0.089 - -0.153)	-0.053 (-0.054 - -0.052)	0.051 (0.013 - 0.089)	-0.553 (-0.341 - -0.764)	-0.443 (-0.497 - -0.39)	12.844 (-14.415 - 40.104)	-0.303 (-0.206 - -0.401)	-0.187 (-0.262 - -0.112)	1.684 (-0.745 - 4.112)	-0.134 (-0.082 - -0.187)	-0.042 (-0.051 - -0.033)	0.127 (0.018 - 0.236)	0.099 (-9.241 - 9.438)	-0.396 (-0.051 - -0.741)	0.302 (-0.981 - 1.585)	0.044 (-3.961 - 4.05)	-0.315 (-0.157 - -0.473)	0.125 (-0.338 - 0.588)	0.01 (-0.782 - 0.802)	-0.206 (-0.229 - -0.183)	0.027 (-0.036 - 0.09)	NA	NA	NA	NA	NA	NA	NA	NA	NA
Picoides tridactylus	Three-toed Woodpecker	dense	forest	NA	NA	NA	NA	NA	NA	NA	NA	NA	0.096 (-0.601 - 0.793)	-0.165 (-0.452 - 0.121)	-0.324 (-0.329 - -0.319)	0.046 (-0.245 - 0.338)	-0.094 (-0.256 - 0.068)	-0.223 (-0.241 - -0.206)	0.011 (-0.024 - 0.047)	-0.027 (-0.045 - -0.01)	-0.083 (-0.068 - -0.097)	NA	NA	NA	NA	NA	NA	NA	NA	NA	NA	NA	NA	NA	NA	NA	NA	NA	NA
Picus canus	Grey-faced Woodpecker	dense	forest	NA	NA	NA	NA	NA	NA	NA	NA	NA	NA	NA	NA	NA	NA	NA	NA	NA	NA	NA	NA	NA	NA	NA	NA	NA	NA	NA	NA	NA	NA	NA	NA	NA	NA	NA	NA
Pinicola enucleator	Pine Grosbeak	dense	forest	NA	NA	NA	NA	NA	NA	NA	NA	NA	NA	NA	NA	NA	NA	NA	NA	NA	NA	1.221 (-12.238 - 14.68)	-0.224 (-0.069 - -0.38)	6.815 (-57.256 - 70.886)	0.191 (-1.329 - 1.71)	-0.094 (-0.027 - -0.161)	0.631 (-3.252 - 4.513)	0.016 (-0.05 - 0.082)	-0.029 (-0.01 - -0.048)	0.034 (-0.072 - 0.14)	NA	NA	NA	NA	NA	NA	NA	NA	NA
Poecile cinctus	Siberian Tit	dense	forest	0.371 (-1.887 - 2.629)	-0.366 (-0.243 - -0.488)	-0.366 (-0.236 - -0.497)	0.107 (-0.426 - 0.641)	-0.191 (-0.148 - -0.234)	-0.192 (-0.137 - -0.246)	0.016 (-0.027 - 0.059)	-0.06 (-0.043 - -0.076)	-0.06 (-0.037 - -0.083)	-0.231 (-0.293 - -0.168)	-0.227 (-0.282 - -0.171)	-0.27 (-0.181 - -0.359)	-0.16 (-0.224 - -0.095)	-0.156 (-0.21 - -0.101)	-0.211 (-0.141 - -0.281)	-0.058 (-0.046 - -0.071)	-0.056 (-0.043 - -0.07)	-0.093 (-0.032 - -0.155)	237.539 (-1053.82 - 1528.899)	-0.476 (-0.328 - -0.624)	-0.418 (-0.645 - -0.191)	8.765 (-20.103 - 37.632)	-0.221 (-0.193 - -0.25)	-0.164 (-0.346 - 0.018)	0.226 (-0.095 - 0.548)	-0.067 (-0.072 - -0.062)	-0.035 (-0.068 - -0.002)	NA	NA	NA	NA	NA	NA	NA	NA	NA
Poecile montanus	Willow Tit	dense	forest	-0.073 (-0.23 - 0.085)	0.383 (0.038 - 0.729)	0.036 (-0.148 - 0.221)	-0.029 (-0.093 - 0.034)	0.133 (0.03 - 0.236)	0.014 (-0.053 - 0.081)	-0.006 (-0.014 - 0.002)	0.024 (0.013 - 0.035)	0.003 (-0.005 - 0.011)	-0.004 (-0.199 - 0.19)	0.374 (-0.001 - 0.748)	-0.052 (-0.2 - 0.096)	-0.002 (-0.061 - 0.058)	0.119 (0.022 - 0.216)	-0.019 (-0.065 - 0.027)	0 (-0.005 - 0.005)	0.019 (0.01 - 0.029)	-0.003 (-0.007 - 0)	NA	NA	NA	NA	NA	NA	NA	NA	NA	NA	NA	NA	NA	NA	NA	NA	NA	NA
Poecile palustris	Marsh Tit	dense	forest	-0.65 (-0.628 - -0.672)	-0.615 (-0.612 - -0.619)	-0.443 (-0.523 - -0.364)	-0.312 (-0.321 - -0.304)	-0.283 (-0.3 - -0.266)	-0.179 (-0.224 - -0.134)	-0.082 (-0.086 - -0.079)	-0.07 (-0.075 - -0.065)	-0.037 (-0.045 - -0.03)	-0.126 (-0.22 - -0.032)	-0.031 (-0.24 - 0.178)	-0.008 (-0.218 - 0.203)	-0.076 (-0.14 - -0.012)	-0.017 (-0.127 - 0.093)	-0.004 (-0.11 - 0.102)	-0.023 (-0.033 - -0.014)	-0.005 (-0.023 - 0.013)	-0.001 (-0.018 - 0.015)	-0.726 (-0.69 - -0.762)	-0.689 (-0.676 - -0.703)	-0.425 (-0.56 - -0.29)	-0.346 (-0.35 - -0.341)	-0.313 (-0.329 - -0.297)	-0.161 (-0.225 - -0.097)	-0.092 (-0.096 - -0.088)	-0.077 (-0.082 - -0.072)	-0.032 (-0.041 - -0.022)	-0.606 (-0.387 - -0.824)	-0.603 (-0.394 - -0.811)	-0.518 (-0.586 - -0.449)	-0.315 (-0.228 - -0.402)	-0.303 (-0.241 - -0.366)	-0.215 (-0.321 - -0.11)	-0.127 (-0.092 - -0.162)	-0.101 (-0.084 - -0.118)	-0.048 (-0.065 - -0.031)
Pyrrhula pyrrhula	Eurasian Bullfinch	semi-open	forest	0.032 (-0.131 - 0.194)	0.075 (-0.091 - 0.241)	0.497 (0.198 - 0.797)	0.013 (-0.05 - 0.077)	0.032 (-0.031 - 0.094)	0.185 (0.093 - 0.276)	0.003 (-0.005 - 0.011)	0.007 (-0.001 - 0.014)	0.035 (0.025 - 0.045)	0.046 (-0.14 - 0.233)	0.697 (0.187 - 1.207)	0.168 (-0.066 - 0.402)	0.018 (-0.044 - 0.08)	0.227 (0.096 - 0.358)	0.063 (-0.01 - 0.136)	0.004 (-0.003 - 0.01)	0.038 (0.024 - 0.052)	0.012 (0.004 - 0.02)	-0.04 (-0.268 - 0.187)	-0.154 (-0.3 - -0.008)	0.599 (0.12 - 1.077)	-0.018 (-0.117 - 0.081)	-0.071 (-0.142 - 0)	0.221 (0.075 - 0.367)	-0.004 (-0.019 - 0.011)	-0.017 (-0.028 - -0.006)	0.042 (0.025 - 0.059)	NA	NA	NA	NA	NA	NA	NA	NA	NA
Regulus regulus	Goldcrest	dense	forest	-0.521 (-0.524 - -0.518)	-0.405 (-0.438 - -0.372)	0.026 (-0.117 - 0.169)	-0.182 (-0.188 - -0.177)	-0.134 (-0.147 - -0.121)	0.007 (-0.027 - 0.042)	-0.033 (-0.032 - -0.034)	-0.023 (-0.023 - -0.023)	0.001 (-0.001 - 0.003)	-0.392 (-0.24 - -0.544)	-0.296 (-0.203 - -0.388)	-0.046 (-0.087 - -0.005)	-0.154 (-0.092 - -0.216)	-0.111 (-0.072 - -0.149)	-0.016 (-0.023 - -0.008)	-0.031 (-0.017 - -0.045)	-0.021 (-0.012 - -0.03)	-0.003 (-0.003 - -0.003)	-0.689 (-0.659 - -0.718)	-0.558 (-0.572 - -0.544)	-0.056 (-0.249 - 0.137)	-0.255 (-0.256 - -0.254)	-0.189 (-0.202 - -0.176)	-0.016 (-0.065 - 0.034)	-0.05 (-0.05 - -0.051)	-0.033 (-0.034 - -0.033)	-0.002 (-0.006 - 0.001)	4.931 (-15.333 - 25.195)	0.004 (-0.531 - 0.54)	-0.141 (-0.147 - -0.135)	0.995 (-1.684 - 3.674)	0.002 (-0.29 - 0.294)	-0.107 (-0.166 - -0.049)	0.118 (-0.045 - 0.28)	0.001 (-0.057 - 0.059)	-0.044 (-0.068 - -0.02)
Scolopax rusticola	Eurasian Woodcock	open	forest	NA	NA	NA	NA	NA	NA	NA	NA	NA	0.335 (-0.244 - 0.914)	0.861 (-0.225 - 1.947)	0.417 (-0.198 - 1.031)	0.154 (-0.071 - 0.379)	0.34 (0.004 - 0.676)	0.186 (-0.042 - 0.415)	0.036 (0.004 - 0.069)	0.07 (0.028 - 0.112)	0.043 (0.01 - 0.075)	1.232 (-0.993 - 3.456)	0.09 (-0.4 - 0.58)	0.316 (-0.373 - 1.005)	0.423 (-0.152 - 0.998)	0.043 (-0.175 - 0.262)	0.138 (-0.116 - 0.392)	0.077 (0.015 - 0.139)	0.011 (-0.025 - 0.046)	0.031 (-0.004 - 0.066)	-0.282 (2.806 - -3.37)	4393675681646.19 (-841691533592942 - 850478884956234)	-0.282 (2.806 - -3.37)	-0.167 (0.928 - -1.263)	9640346.086 (-1082871579.267 - 1102152271.439)	-0.167 (0.928 - -1.263)	-0.098 (0.194 - -0.391)	21.053 (-701.439 - 743.545)	-0.099 (0.219 - -0.418)
Sitta europaea	Eurasian Nuthatch	dense	forest	-0.538 (-0.587 - -0.489)	-0.612 (-0.627 - -0.597)	-0.672 (-0.665 - -0.679)	-0.205 (-0.233 - -0.178)	-0.243 (-0.259 - -0.227)	-0.278 (-0.286 - -0.27)	-0.041 (-0.044 - -0.038)	-0.05 (-0.052 - -0.049)	-0.061 (-0.061 - -0.06)	-0.129 (-0.201 - -0.056)	0.242 (-0.183 - 0.667)	-0.236 (-0.214 - -0.258)	-0.09 (-0.136 - -0.044)	0.138 (-0.056 - 0.333)	-0.184 (-0.175 - -0.192)	-0.032 (-0.035 - -0.03)	0.04 (0.005 - 0.076)	-0.074 (-0.06 - -0.089)	-0.667 (-0.715 - -0.62)	-0.718 (-0.732 - -0.704)	-0.802 (-0.78 - -0.824)	-0.247 (-0.277 - -0.218)	-0.273 (-0.29 - -0.255)	-0.321 (-0.325 - -0.316)	-0.048 (-0.051 - -0.044)	-0.054 (-0.055 - -0.053)	-0.068 (-0.068 - -0.068)	0.369 (-0.366 - 1.104)	-0.467 (-0.445 - -0.489)	-0.247 (-0.376 - -0.119)	0.104 (-0.074 - 0.281)	-0.193 (-0.206 - -0.181)	-0.086 (-0.14 - -0.032)	0.015 (0.001 - 0.029)	-0.042 (-0.042 - -0.043)	-0.015 (-0.02 - -0.011)
Spinus spinus	Eurasian Siskin	dense	forest	-0.314 (-0.341 - -0.287)	-0.334 (-0.351 - -0.318)	-0.054 (-0.175 - 0.067)	-0.102 (-0.109 - -0.094)	-0.11 (-0.114 - -0.105)	-0.016 (-0.043 - 0.012)	-0.017 (-0.016 - -0.018)	-0.018 (-0.017 - -0.02)	-0.002 (-0.004 - -0.001)	0.019 (-0.107 - 0.146)	-0.323 (-0.297 - -0.35)	-0.171 (-0.198 - -0.145)	0.007 (-0.025 - 0.039)	-0.127 (-0.109 - -0.144)	-0.064 (-0.066 - -0.063)	0.001 (-0.001 - 0.004)	-0.025 (-0.019 - -0.032)	-0.012 (-0.01 - -0.015)	-0.495 (-0.429 - -0.561)	-0.362 (-0.412 - -0.312)	-0.031 (-0.347 - 0.285)	-0.208 (-0.197 - -0.218)	-0.125 (-0.155 - -0.094)	-0.009 (-0.093 - 0.076)	-0.05 (-0.049 - -0.051)	-0.022 (-0.026 - -0.019)	-0.001 (-0.009 - 0.006)	-0.105 (-0.002 - -0.208)	0.177 (-7.117 - 7.472)	0.3 (-4.364 - 4.964)	-0.083 (-0.013 - -0.152)	0.065 (-2.148 - 2.278)	0.1 (-1.099 - 1.299)	-0.06 (-0.016 - -0.104)	0.012 (-0.29 - 0.315)	0.017 (-0.105 - 0.14)
Surnia ulula	Northern Hawk-owl	open	forest	NA	NA	NA	NA	NA	NA	NA	NA	NA	NA	NA	NA	NA	NA	NA	NA	NA	NA	NA	NA	NA	NA	NA	NA	NA	NA	NA	NA	NA	NA	NA	NA	NA	NA	NA	NA
Tetrao urogallus	Western Capercaillie	semi-open	forest	-0.017 (-0.244 - 0.209)	-0.288 (-0.338 - -0.239)	-0.224 (-0.298 - -0.149)	-0.005 (-0.064 - 0.054)	-0.102 (-0.12 - -0.083)	-0.075 (-0.098 - -0.052)	-0.001 (-0.005 - 0.003)	-0.018 (-0.018 - -0.019)	-0.013 (-0.013 - -0.013)	-0.06 (-0.308 - 0.188)	-0.352 (-0.409 - -0.296)	-0.254 (-0.358 - -0.15)	-0.018 (-0.081 - 0.045)	-0.124 (-0.143 - -0.105)	-0.083 (-0.113 - -0.054)	-0.003 (-0.006 - 0.001)	-0.023 (-0.02 - -0.025)	-0.014 (-0.014 - -0.014)	-0.341 (-0.474 - -0.207)	-0.024 (-0.748 - 0.7)	-0.258 (-0.462 - -0.054)	-0.143 (-0.238 - -0.049)	-0.008 (-0.224 - 0.208)	-0.099 (-0.19 - -0.009)	-0.032 (-0.044 - -0.02)	-0.001 (-0.019 - 0.016)	-0.02 (-0.026 - -0.014)	NA	NA	NA	NA	NA	NA	NA	NA	NA
Turdus viscivorus	Mistle Thrush	semi-open	forest	0.199 (-0.02 - 0.419)	0 (-0.151 - 0.151)	-0.176 (-0.275 - -0.077)	0.074 (0.002 - 0.146)	0 (-0.055 - 0.055)	-0.073 (-0.115 - -0.032)	0.014 (0.006 - 0.022)	0 (-0.006 - 0.006)	-0.016 (-0.021 - -0.011)	0.86 (0.316 - 1.404)	0.373 (0.016 - 0.729)	0.19 (-0.056 - 0.436)	0.259 (0.129 - 0.388)	0.124 (0.025 - 0.223)	0.067 (-0.007 - 0.14)	0.04 (0.028 - 0.053)	0.021 (0.011 - 0.031)	0.012 (0.005 - 0.019)	0.094 (-0.221 - 0.41)	-0.214 (-0.376 - -0.051)	-0.402 (-0.497 - -0.307)	0.034 (-0.071 - 0.139)	-0.084 (-0.15 - -0.018)	-0.168 (-0.217 - -0.12)	0.006 (-0.006 - 0.018)	-0.017 (-0.025 - -0.008)	-0.036 (-0.043 - -0.029)	NA	NA	NA	NA	NA	NA	NA	NA	NA
Anthus campestris	Tawny Pipit	open	intermediate	0.564 (-0.149 - 1.276)	0.966 (0.023 - 1.909)	-0.037 (-0.133 - 0.06)	0.302 (0.018 - 0.585)	0.453 (0.141 - 0.764)	-0.03 (-0.12 - 0.059)	0.085 (0.036 - 0.134)	0.114 (0.069 - 0.159)	-0.013 (-0.045 - 0.019)	NA	NA	NA	NA	NA	NA	NA	NA	NA	0.539 (-0.949 - 2.028)	0.442 (-0.532 - 1.415)	0.136 (-0.247 - 0.519)	0.288 (-0.29 - 0.867)	0.247 (-0.152 - 0.646)	0.093 (-0.113 - 0.298)	0.081 (-0.006 - 0.168)	0.072 (0.008 - 0.136)	0.032 (-0.006 - 0.071)	2.057 (-1.037 - 5.151)	3.757 (-1.258 - 8.771)	-0.054 (-0.141 - 0.034)	0.755 (0.001 - 1.51)	1.129 (0.159 - 2.099)	-0.049 (-0.149 - 0.051)	0.157 (0.075 - 0.238)	0.199 (0.113 - 0.284)	-0.023 (-0.065 - 0.019)
Anthus trivialis	Tree Pipit	semi-open	intermediate	1.115 (0.791 - 1.438)	1.164 (0.842 - 1.487)	0.258 (0.131 - 0.385)	0.303 (0.236 - 0.37)	0.314 (0.248 - 0.38)	0.083 (0.05 - 0.115)	0.043 (0.037 - 0.048)	0.044 (0.038 - 0.05)	0.014 (0.011 - 0.016)	0.768 (0.43 - 1.106)	0.682 (0.34 - 1.024)	-0.079 (-0.197 - 0.039)	0.237 (0.154 - 0.319)	0.212 (0.128 - 0.297)	-0.028 (-0.06 - 0.005)	0.037 (0.028 - 0.046)	0.034 (0.025 - 0.043)	-0.005 (-0.007 - -0.003)	0.775 (0.423 - 1.127)	1.131 (0.722 - 1.539)	0.264 (0.085 - 0.443)	0.233 (0.148 - 0.317)	0.318 (0.23 - 0.406)	0.09 (0.036 - 0.143)	0.036 (0.028 - 0.044)	0.046 (0.039 - 0.054)	0.016 (0.01 - 0.021)	1.754 (-3.716 - 7.225)	0.062 (-0.44 - 0.565)	0.667 (-0.957 - 2.292)	0.496 (-0.579 - 1.571)	0.031 (-0.186 - 0.248)	0.242 (-0.192 - 0.676)	0.077 (-0.013 - 0.166)	0.008 (-0.024 - 0.04)	0.046 (0 - 0.093)
Athene noctua	Little Owl	open	intermediate	NA	NA	NA	NA	NA	NA	NA	NA	NA	NA	NA	NA	NA	NA	NA	NA	NA	NA	-0.196 (-0.177 - -0.215)	18.632 (-126.836 - 164.099)	-0.199 (-0.145 - -0.254)	-0.234 (-0.356 - -0.111)	3.542 (-13.704 - 20.788)	-0.249 (-0.278 - -0.221)	-0.166 (-0.451 - 0.118)	0.424 (-0.594 - 1.441)	-0.203 (-0.42 - 0.013)	28.636 (-67.189 - 124.461)	-0.079 (-0.125 - -0.033)	0.036 (-0.366 - 0.439)	4.67 (-4.815 - 14.154)	-0.105 (-0.226 - 0.015)	0.035 (-0.324 - 0.394)	0.516 (0.055 - 0.977)	-0.074 (-0.201 - 0.052)	0.017 (-0.136 - 0.17)
Cecropis daurica	Red-rumped Swallow	open	intermediate	-0.192 (-0.186 - -0.198)	-0.176 (-0.189 - -0.163)	-0.135 (-0.198 - -0.072)	-0.164 (-0.201 - -0.127)	-0.144 (-0.191 - -0.098)	-0.102 (-0.175 - -0.029)	-0.075 (-0.096 - -0.053)	-0.062 (-0.082 - -0.042)	-0.04 (-0.062 - -0.017)	NA	NA	NA	NA	NA	NA	NA	NA	NA	-0.156 (-0.14 - -0.171)	0.65 (-4.742 - 6.041)	-0.15 (-0.132 - -0.168)	-0.106 (-0.177 - -0.035)	0.223 (-1.119 - 1.564)	-0.1 (-0.149 - -0.05)	-0.039 (-0.061 - -0.016)	0.04 (-0.082 - 0.162)	-0.035 (-0.042 - -0.029)	-0.133 (-0.205 - -0.061)	-0.129 (-0.197 - -0.062)	-0.05 (-0.217 - 0.117)	-0.105 (-0.201 - -0.009)	-0.102 (-0.191 - -0.012)	-0.035 (-0.165 - 0.096)	-0.043 (-0.088 - 0.002)	-0.041 (-0.081 - -0.001)	-0.012 (-0.053 - 0.028)
Clamator glandarius	Great Spotted Cuckoo	semi-open	intermediate	1.256 (-5.226 - 7.738)	0.042 (-0.461 - 0.545)	-0.084 (-0.04 - -0.129)	0.628 (-1.565 - 2.822)	0.041 (-0.407 - 0.489)	-0.153 (-0.106 - -0.2)	0.176 (-0.173 - 0.526)	0.021 (-0.164 - 0.205)	-0.233 (-0.262 - -0.204)	NA	NA	NA	NA	NA	NA	NA	NA	NA	NA	NA	NA	NA	NA	NA	NA	NA	NA	1.561 (-6.59 - 9.712)	0.034 (-0.437 - 0.505)	-0.086 (-0.041 - -0.131)	0.74 (-1.845 - 3.325)	0.034 (-0.405 - 0.474)	-0.157 (-0.118 - -0.195)	0.199 (-0.2 - 0.597)	0.018 (-0.182 - 0.218)	-0.217 (-0.302 - -0.132)
Coracias garrulus	European Roller	semi-open	intermediate	0.342 (-1.799 - 2.482)	10.331 (-44.14 - 64.801)	-0.031 (-0.054 - -0.008)	0.245 (-0.839 - 1.329)	2.254 (-4.972 - 9.48)	-0.05 (-0.131 - 0.03)	0.096 (-0.161 - 0.352)	0.33 (-0.13 - 0.79)	-0.043 (-0.139 - 0.054)	NA	NA	NA	NA	NA	NA	NA	NA	NA	-0.018 (-0.147 - 0.112)	-0.024 (0.018 - -0.066)	2.15821428755019e+28 (-7.83924128448559e+29 - 8.27088414199563e+29)	-0.036 (-0.463 - 0.39)	-0.065 (0.001 - -0.132)	27575380319821496 (-577949736429667200 - 633100497069310336)	-0.039 (-0.696 - 0.617)	-0.159 (-0.243 - -0.075)	35232.724 (-197340.777 - 267806.224)	0.092 (-0.666 - 0.85)	6.116 (-27.17 - 39.403)	-0.04 (-0.019 - -0.061)	0.092 (-0.514 - 0.698)	1.678 (-3.93 - 7.287)	-0.077 (-0.091 - -0.063)	0.048 (-0.191 - 0.286)	0.299 (-0.162 - 0.759)	-0.084 (-0.174 - 0.007)
Cyanopica cooki	Iberian Azure-winged Magpie	semi-open	intermediate	NA	NA	NA	NA	NA	NA	NA	NA	NA	NA	NA	NA	NA	NA	NA	NA	NA	NA	NA	NA	NA	NA	NA	NA	NA	NA	NA	NA	NA	NA	NA	NA	NA	NA	NA	NA
Emberiza cirlus	Cirl Bunting	semi-open	intermediate	-0.248 (-0.282 - -0.214)	-0.084 (-0.188 - 0.02)	-0.165 (-0.226 - -0.103)	-0.17 (-0.208 - -0.133)	-0.051 (-0.117 - 0.014)	-0.106 (-0.153 - -0.059)	-0.06 (-0.069 - -0.052)	-0.016 (-0.028 - -0.004)	-0.035 (-0.043 - -0.026)	NA	NA	NA	NA	NA	NA	NA	NA	NA	-0.01 (-0.25 - 0.23)	-0.055 (-0.218 - 0.108)	-0.218 (-0.219 - -0.217)	-0.007 (-0.185 - 0.17)	-0.043 (-0.175 - 0.09)	-0.215 (-0.252 - -0.178)	-0.003 (-0.049 - 0.043)	-0.017 (-0.052 - 0.018)	-0.113 (-0.132 - -0.093)	-0.322 (-0.394 - -0.25)	0.022 (-0.221 - 0.266)	-0.142 (-0.276 - -0.008)	-0.181 (-0.235 - -0.127)	0.011 (-0.097 - 0.119)	-0.073 (-0.142 - -0.004)	-0.052 (-0.059 - -0.045)	0.003 (-0.011 - 0.016)	-0.019 (-0.027 - -0.011)
Emberiza citrinella	Yellowhammer	open	intermediate	0.157 (0.055 - 0.26)	0.584 (0.375 - 0.793)	0.527 (0.338 - 0.716)	0.12 (0.055 - 0.186)	0.38 (0.276 - 0.483)	0.349 (0.253 - 0.445)	0.047 (0.033 - 0.061)	0.128 (0.108 - 0.148)	0.119 (0.101 - 0.138)	0.056 (-0.013 - 0.124)	1.109 (0.478 - 1.74)	0.689 (0.287 - 1.092)	0.066 (0.003 - 0.129)	0.884 (0.467 - 1.301)	0.611 (0.315 - 0.908)	0.04 (0.014 - 0.065)	0.374 (0.217 - 0.531)	0.284 (0.163 - 0.404)	0.296 (0.104 - 0.488)	0.304 (0.129 - 0.478)	0.421 (0.216 - 0.626)	0.205 (0.094 - 0.315)	0.209 (0.11 - 0.309)	0.278 (0.169 - 0.387)	0.073 (0.049 - 0.097)	0.074 (0.053 - 0.095)	0.095 (0.073 - 0.116)	NA	NA	NA	NA	NA	NA	NA	NA	NA
Emberiza hortulana	Ortolan Bunting	semi-open	intermediate	6.02 (0.029 - 12.011)	3.936 (0.675 - 7.198)	0.757 (0.062 - 1.452)	1.682 (0.626 - 2.738)	1.284 (0.602 - 1.965)	0.423 (0.156 - 0.69)	0.291 (0.2 - 0.382)	0.252 (0.182 - 0.322)	0.129 (0.085 - 0.174)	239.882 (-282.397 - 762.161)	41.801 (-55.094 - 138.696)	-0.045 (-0.038 - -0.052)	16.76 (-5.66 - 39.18)	5.923 (-2.567 - 14.412)	-0.079 (-0.097 - -0.061)	0.918 (0.28 - 1.555)	0.603 (0.152 - 1.053)	-0.073 (-0.079 - -0.068)	-0.1 (-0.156 - -0.044)	-0.085 (-0.131 - -0.039)	1.645 (-0.749 - 4.039)	-0.122 (-0.274 - 0.031)	-0.096 (-0.19 - -0.002)	0.72 (0.02 - 1.42)	-0.079 (-0.22 - 0.063)	-0.056 (-0.115 - 0.002)	0.176 (0.088 - 0.264)	4.854 (-2.332 - 12.04)	13.439 (-3.268 - 30.145)	1.048 (-0.319 - 2.415)	1.257 (0.08 - 2.433)	2.376 (0.549 - 4.203)	0.455 (0.057 - 0.853)	0.198 (0.101 - 0.295)	0.274 (0.161 - 0.387)	0.11 (0.055 - 0.164)
Emberiza melanocephala	Black-headed Bunting	semi-open	intermediate	108396.163 (-1931822.919 - 2148615.245)	-0.085 (0.031 - -0.201)	-0.085 (0.032 - -0.202)	583.27 (-5882.336 - 7048.876)	-0.145 (-0.057 - -0.232)	-0.145 (-0.047 - -0.243)	2.877 (-7.556 - 13.311)	-0.169 (-0.29 - -0.047)	-0.172 (-0.246 - -0.098)	NA	NA	NA	NA	NA	NA	NA	NA	NA	0.476 (-10.329 - 11.281)	-0.034 (0.026 - -0.095)	-0.034 (0.024 - -0.092)	0.344 (-4.974 - 5.661)	-0.084 (-0.019 - -0.149)	-0.083 (-0.036 - -0.129)	0.139 (-1.073 - 1.35)	-0.131 (-0.21 - -0.053)	-0.125 (-0.254 - 0.005)	NA	NA	NA	NA	NA	NA	NA	NA	NA
Galerida theklae	Thekla's Lark	semi-open	intermediate	0.168 (-0.832 - 1.167)	-0.047 (-0.08 - -0.014)	-0.045 (-0.076 - -0.014)	0.125 (-0.462 - 0.713)	-0.059 (-0.135 - 0.018)	-0.055 (-0.124 - 0.013)	0.049 (-0.109 - 0.206)	-0.038 (-0.098 - 0.022)	-0.035 (-0.086 - 0.015)	NA	NA	NA	NA	NA	NA	NA	NA	NA	NA	NA	NA	NA	NA	NA	NA	NA	NA	0.28 (-1.232 - 1.793)	-0.041 (-0.096 - 0.014)	-0.039 (-0.088 - 0.009)	0.188 (-0.572 - 0.948)	-0.049 (-0.147 - 0.049)	-0.047 (-0.132 - 0.038)	0.067 (-0.108 - 0.241)	-0.03 (-0.097 - 0.036)	-0.029 (-0.084 - 0.026)
Lanius collurio	Red-backed Shrike	open	intermediate	0.175 (-0.033 - 0.383)	1.408 (0.695 - 2.121)	0.176 (-0.011 - 0.364)	0.108 (-0.005 - 0.221)	0.62 (0.39 - 0.85)	0.108 (0.007 - 0.21)	0.034 (0.011 - 0.057)	0.145 (0.114 - 0.175)	0.034 (0.014 - 0.054)	0.645 (-0.152 - 1.443)	5.515 (-0.209 - 11.24)	0.19 (-0.166 - 0.546)	0.362 (0.029 - 0.695)	1.691 (0.507 - 2.876)	0.13 (-0.065 - 0.325)	0.106 (0.048 - 0.164)	0.301 (0.173 - 0.428)	0.045 (0.007 - 0.084)	0.074 (-0.166 - 0.315)	1.049 (0.338 - 1.761)	0.177 (-0.087 - 0.442)	0.047 (-0.097 - 0.191)	0.493 (0.237 - 0.75)	0.107 (-0.037 - 0.251)	0.015 (-0.02 - 0.05)	0.121 (0.083 - 0.16)	0.033 (0.002 - 0.064)	NA	NA	NA	NA	NA	NA	NA	NA	NA
Lanius excubitor	Great Grey Shrike	open	intermediate	NA	NA	NA	NA	NA	NA	NA	NA	NA	NA	NA	NA	NA	NA	NA	NA	NA	NA	NA	NA	NA	NA	NA	NA	NA	NA	NA	NA	NA	NA	NA	NA	NA	NA	NA	NA
Lanius meridionalis	Iberian Grey Shrike	semi-open	intermediate	0.203 (-0.156 - 0.562)	1.898 (0.286 - 3.509)	0.1 (-0.116 - 0.315)	0.147 (-0.067 - 0.36)	0.831 (0.358 - 1.303)	0.078 (-0.069 - 0.225)	0.054 (0.003 - 0.106)	0.201 (0.141 - 0.261)	0.031 (-0.008 - 0.07)	NA	NA	NA	NA	NA	NA	NA	NA	NA	-0.05 (-0.099 - 0)	116.009 (-1687.638 - 1919.656)	-0.054 (-0.013 - -0.094)	-0.053 (-0.217 - 0.112)	6.478 (-53.488 - 66.443)	-0.062 (-0.086 - -0.037)	-0.03 (-0.161 - 0.101)	0.274 (-0.716 - 1.263)	-0.04 (-0.08 - 0)	NA	NA	NA	NA	NA	NA	NA	NA	NA
Lanius minor	Lesser Grey Shrike	open	intermediate	2581.779 (-30147.767 - 35311.324)	6432.291 (-65585.442 - 78450.024)	-0.191 (-0.047 - -0.335)	66.408 (-430.793 - 563.609)	113.785 (-637.744 - 865.315)	-0.237 (-0.224 - -0.249)	1.399 (-2.421 - 5.219)	1.7 (-2.274 - 5.674)	-0.194 (-0.496 - 0.109)	NA	NA	NA	NA	NA	NA	NA	NA	NA	1672241223929436 (-36188349060293672 - 39532831508152552)	5.13 (-100.295 - 110.555)	-0.208 (-0.02 - -0.395)	578274412.083 (-7125165033.503 - 8281713857.67)	1.464 (-18.414 - 21.342)	-0.254 (-0.124 - -0.385)	199.66 (-601.013 - 1000.333)	0.241 (-1.644 - 2.126)	-0.292 (-0.305 - -0.278)	NA	NA	NA	NA	NA	NA	NA	NA	NA
Lanius senator	Woodchat Shrike	semi-open	intermediate	NA	NA	NA	NA	NA	NA	NA	NA	NA	NA	NA	NA	NA	NA	NA	NA	NA	NA	-0.144 (-0.02 - -0.267)	2173.125 (-26039.514 - 30385.764)	-0.095 (-0.627 - 0.438)	-0.161 (-0.085 - -0.237)	46.557 (-310.7 - 403.815)	-0.076 (-0.674 - 0.521)	-0.143 (-0.173 - -0.112)	0.821 (-1.458 - 3.1)	-0.032 (-0.328 - 0.264)	NA	NA	NA	NA	NA	NA	NA	NA	NA
Linaria cannabina	Common Linnet	semi-open	intermediate	0.018 (-0.04 - 0.076)	0.102 (0.01 - 0.193)	0.189 (0.054 - 0.325)	0.017 (-0.035 - 0.069)	0.086 (0.019 - 0.153)	0.148 (0.061 - 0.235)	0.008 (-0.01 - 0.027)	0.037 (0.018 - 0.057)	0.06 (0.037 - 0.083)	-0.047 (-0.129 - 0.035)	-0.079 (-0.086 - -0.071)	0.08 (-0.3 - 0.461)	-0.071 (-0.231 - 0.09)	-0.136 (-0.207 - -0.065)	0.093 (-0.294 - 0.48)	-0.054 (-0.162 - 0.053)	-0.124 (-0.202 - -0.047)	0.055 (-0.106 - 0.216)	0.093 (-0.02 - 0.206)	0.188 (0.031 - 0.346)	0.224 (0.032 - 0.417)	0.08 (-0.005 - 0.165)	0.148 (0.047 - 0.249)	0.172 (0.054 - 0.289)	0.036 (0.009 - 0.063)	0.06 (0.033 - 0.088)	0.068 (0.037 - 0.099)	-0.092 (-0.152 - -0.032)	-0.012 (-0.133 - 0.109)	0.129 (-0.088 - 0.346)	-0.084 (-0.153 - -0.015)	-0.01 (-0.109 - 0.089)	0.094 (-0.042 - 0.23)	-0.039 (-0.064 - -0.014)	-0.004 (-0.033 - 0.024)	0.035 (0.003 - 0.067)
Oenanthe hispanica	Black-eared Wheatear	semi-open	intermediate	-0.024 (-0.163 - 0.116)	0.686 (-0.239 - 1.611)	0.299 (-0.188 - 0.786)	-0.02 (-0.148 - 0.108)	0.342 (0.018 - 0.667)	0.18 (-0.042 - 0.403)	-0.009 (-0.056 - 0.039)	0.092 (0.044 - 0.139)	0.057 (0.015 - 0.098)	NA	NA	NA	NA	NA	NA	NA	NA	NA	NA	NA	NA	NA	NA	NA	NA	NA	NA	0.068 (-0.232 - 0.368)	0.604 (-0.227 - 1.434)	0.272 (-0.182 - 0.726)	0.051 (-0.147 - 0.248)	0.313 (0.008 - 0.618)	0.168 (-0.046 - 0.382)	0.019 (-0.034 - 0.072)	0.086 (0.04 - 0.133)	0.054 (0.013 - 0.094)
Passer hispaniolensis	Spanish Sparrow	semi-open	intermediate	-0.126 (-0.029 - -0.222)	0.105 (-1.148 - 1.358)	2.176 (-8.34 - 12.692)	-0.188 (-0.11 - -0.266)	0.084 (-0.772 - 0.941)	0.893 (-1.988 - 3.774)	-0.183 (-0.204 - -0.161)	0.035 (-0.199 - 0.269)	0.207 (-0.134 - 0.548)	NA	NA	NA	NA	NA	NA	NA	NA	NA	NA	NA	NA	NA	NA	NA	NA	NA	NA	-0.142 (0.001 - -0.285)	0.155 (-1.444 - 1.753)	1.913 (-7.386 - 11.213)	-0.224 (-0.043 - -0.405)	0.123 (-0.912 - 1.159)	0.867 (-1.984 - 3.718)	-0.257 (-0.138 - -0.376)	0.051 (-0.2 - 0.301)	0.219 (-0.154 - 0.592)
Saxicola rubetra	Whinchat	semi-open	intermediate	1.992 (0.887 - 3.098)	1.502 (0.675 - 2.329)	-0.02 (-0.086 - 0.046)	0.718 (0.444 - 0.991)	0.587 (0.361 - 0.812)	-0.014 (-0.058 - 0.029)	0.142 (0.113 - 0.171)	0.124 (0.098 - 0.15)	-0.005 (-0.013 - 0.003)	4.554 (1.695 - 7.412)	4.627 (1.647 - 7.606)	-0.083 (-0.151 - -0.015)	2.208 (1.248 - 3.168)	2.232 (1.237 - 3.227)	-0.096 (-0.173 - -0.02)	0.604 (0.431 - 0.776)	0.608 (0.431 - 0.785)	-0.057 (-0.074 - -0.04)	0.572 (-0.068 - 1.212)	0.29 (-0.048 - 0.629)	0.063 (-0.129 - 0.255)	0.264 (0.044 - 0.485)	0.153 (0.013 - 0.293)	0.039 (-0.068 - 0.146)	0.064 (0.034 - 0.095)	0.042 (0.02 - 0.064)	0.013 (-0.01 - 0.035)	5.55 (-45.259 - 56.359)	0.038 (-0.537 - 0.613)	0.103 (-0.638 - 0.845)	1.466 (-6.946 - 9.878)	0.035 (-0.444 - 0.514)	0.085 (-0.418 - 0.588)	0.241 (-0.432 - 0.915)	0.017 (-0.161 - 0.194)	0.036 (-0.112 - 0.184)
Saxicola torquatus	Common Stonechat	open	intermediate	1.588 (0.907 - 2.268)	0.893 (0.491 - 1.294)	0.394 (0.15 - 0.639)	0.649 (0.449 - 0.849)	0.416 (0.276 - 0.557)	0.212 (0.105 - 0.319)	0.141 (0.117 - 0.166)	0.102 (0.082 - 0.122)	0.059 (0.041 - 0.077)	NA	NA	NA	NA	NA	NA	NA	NA	NA	1.517 (0.605 - 2.429)	0.516 (0.149 - 0.883)	0.515 (0.126 - 0.905)	0.625 (0.355 - 0.895)	0.266 (0.118 - 0.415)	0.266 (0.108 - 0.424)	0.137 (0.105 - 0.17)	0.071 (0.048 - 0.094)	0.071 (0.046 - 0.096)	NA	NA	NA	NA	NA	NA	NA	NA	NA
Serinus serinus	European Serin	semi-open	intermediate	-0.033 (-0.097 - 0.032)	0.013 (-0.06 - 0.087)	0.146 (0.038 - 0.254)	-0.024 (-0.07 - 0.021)	0.009 (-0.037 - 0.056)	0.094 (0.037 - 0.151)	-0.009 (-0.019 - 0)	0.003 (-0.006 - 0.013)	0.031 (0.021 - 0.041)	NA	NA	NA	NA	NA	NA	NA	NA	NA	0.096 (-0.113 - 0.305)	-0.098 (-0.144 - -0.052)	0.128 (-0.072 - 0.329)	0.063 (-0.062 - 0.187)	-0.08 (-0.131 - -0.03)	0.082 (-0.031 - 0.195)	0.021 (-0.009 - 0.051)	-0.034 (-0.053 - -0.015)	0.027 (0.001 - 0.052)	NA	NA	NA	NA	NA	NA	NA	NA	NA
Streptopelia turtur	European Turtle-dove	semi-open	intermediate	-0.184 (-0.227 - -0.141)	0.277 (0.037 - 0.517)	0.599 (0.245 - 0.953)	-0.127 (-0.164 - -0.089)	0.142 (0.043 - 0.242)	0.277 (0.152 - 0.401)	-0.045 (-0.053 - -0.037)	0.038 (0.023 - 0.052)	0.066 (0.05 - 0.083)	NA	NA	NA	NA	NA	NA	NA	NA	NA	-0.198 (-0.245 - -0.151)	0.335 (-0.008 - 0.678)	1.076 (0.356 - 1.796)	-0.139 (-0.184 - -0.094)	0.168 (0.03 - 0.306)	0.443 (0.225 - 0.66)	-0.05 (-0.061 - -0.039)	0.043 (0.024 - 0.063)	0.096 (0.07 - 0.121)	NA	NA	NA	NA	NA	NA	NA	NA	NA
Sylvia cantillans / Sylvia subalpina	Subalpine Warbler	dense	intermediate	-0.206 (-0.237 - -0.175)	0.48 (0.185 - 0.774)	0.107 (-0.02 - 0.234)	-0.096 (-0.111 - -0.08)	0.173 (0.092 - 0.255)	0.043 (0.003 - 0.083)	-0.023 (-0.022 - -0.023)	0.032 (0.023 - 0.042)	0.009 (0.005 - 0.013)	NA	NA	NA	NA	NA	NA	NA	NA	NA	0.324 (-1.381 - 2.029)	3.943 (-5.148 - 13.034)	-0.033 (-0.322 - 0.255)	0.124 (-0.382 - 0.631)	0.817 (-0.463 - 2.097)	-0.016 (-0.14 - 0.107)	0.025 (-0.029 - 0.078)	0.096 (0.005 - 0.187)	-0.004 (-0.015 - 0.007)	-0.232 (-0.27 - -0.194)	0.402 (0.131 - 0.674)	0.095 (-0.04 - 0.23)	-0.11 (-0.136 - -0.083)	0.149 (0.069 - 0.23)	0.039 (-0.009 - 0.087)	-0.027 (-0.028 - -0.025)	0.028 (0.02 - 0.037)	0.008 (0.003 - 0.013)
Sylvia communis	Common Whitethroat	open	intermediate	0.047 (-0.02 - 0.114)	0.405 (0.216 - 0.594)	0.114 (0.026 - 0.202)	0.043 (-0.01 - 0.095)	0.286 (0.185 - 0.387)	0.096 (0.034 - 0.158)	0.02 (0.005 - 0.034)	0.105 (0.084 - 0.126)	0.042 (0.026 - 0.057)	0.071 (-0.05 - 0.192)	0.68 (-0.268 - 1.628)	0.266 (-0.121 - 0.654)	0.096 (-0.047 - 0.239)	0.639 (-0.169 - 1.446)	0.306 (-0.095 - 0.708)	0.067 (-0.019 - 0.153)	0.32 (-0.06 - 0.7)	0.183 (-0.038 - 0.403)	0.094 (-0.006 - 0.194)	0.294 (0.12 - 0.468)	0.123 (0.015 - 0.231)	0.084 (0.006 - 0.161)	0.228 (0.121 - 0.334)	0.107 (0.027 - 0.187)	0.038 (0.015 - 0.06)	0.091 (0.066 - 0.116)	0.047 (0.025 - 0.07)	-0.196 (-0.188 - -0.205)	0.598 (-0.456 - 1.653)	-0.133 (-0.198 - -0.067)	-0.128 (-0.155 - -0.101)	0.209 (-0.072 - 0.489)	-0.074 (-0.128 - -0.02)	-0.045 (-0.058 - -0.032)	0.038 (0.009 - 0.067)	-0.022 (-0.033 - -0.01)
Sylvia conspicillata	Spectacled Warbler	semi-open	intermediate	NA	NA	NA	NA	NA	NA	NA	NA	NA	NA	NA	NA	NA	NA	NA	NA	NA	NA	NA	NA	NA	NA	NA	NA	NA	NA	NA	NA	NA	NA	NA	NA	NA	NA	NA	NA
Sylvia hortensis	Western Orphean Warbler	semi-open	intermediate	-0.174 (-0.215 - -0.133)	0.364 (-0.327 - 1.055)	0.144 (-0.236 - 0.525)	-0.141 (-0.223 - -0.06)	0.188 (-0.101 - 0.477)	0.083 (-0.11 - 0.277)	-0.06 (-0.097 - -0.023)	0.05 (0.003 - 0.097)	0.025 (-0.012 - 0.061)	NA	NA	NA	NA	NA	NA	NA	NA	NA	NA	NA	NA	NA	NA	NA	NA	NA	NA	-0.17 (-0.223 - -0.117)	0.431 (-0.355 - 1.217)	0.116 (-0.242 - 0.474)	-0.138 (-0.23 - -0.045)	0.219 (-0.099 - 0.537)	0.069 (-0.122 - 0.26)	-0.058 (-0.099 - -0.017)	0.058 (0.007 - 0.108)	0.021 (-0.016 - 0.058)
Sylvia melanocephala	Sardinian Warbler	semi-open	intermediate	-0.082 (-0.115 - -0.05)	-0.011 (-0.063 - 0.042)	0.045 (-0.017 - 0.107)	-0.057 (-0.084 - -0.03)	-0.007 (-0.04 - 0.026)	0.028 (-0.006 - 0.061)	-0.02 (-0.024 - -0.016)	-0.002 (-0.007 - 0.003)	0.009 (0.004 - 0.014)	NA	NA	NA	NA	NA	NA	NA	NA	NA	0.119 (-0.481 - 0.719)	0.309 (-0.688 - 1.307)	-0.019 (-0.101 - 0.063)	0.074 (-0.215 - 0.362)	0.155 (-0.203 - 0.512)	-0.016 (-0.095 - 0.062)	0.024 (-0.031 - 0.078)	0.041 (-0.012 - 0.094)	-0.007 (-0.031 - 0.016)	-0.091 (-0.111 - -0.071)	0.025 (-0.043 - 0.094)	0.106 (0.014 - 0.198)	-0.059 (-0.067 - -0.051)	0.015 (-0.015 - 0.045)	0.06 (0.02 - 0.101)	-0.019 (-0.016 - -0.022)	0.005 (0 - 0.009)	0.017 (0.01 - 0.025)
Sylvia undata	Dartford Warbler	semi-open	intermediate	0.082 (-0.033 - 0.197)	0.459 (0.191 - 0.727)	0.412 (0.185 - 0.638)	0.042 (-0.01 - 0.094)	0.188 (0.106 - 0.269)	0.172 (0.101 - 0.242)	0.011 (0.003 - 0.019)	0.04 (0.029 - 0.051)	0.037 (0.028 - 0.047)	NA	NA	NA	NA	NA	NA	NA	NA	NA	-0.071 (-0.112 - -0.031)	2.203 (-0.57 - 4.975)	0.054 (-0.145 - 0.253)	-0.048 (-0.088 - -0.008)	0.609 (0.089 - 1.129)	0.03 (-0.068 - 0.128)	-0.017 (-0.018 - -0.015)	0.094 (0.037 - 0.152)	0.008 (-0.006 - 0.023)	0.125 (-0.063 - 0.314)	0.425 (0.091 - 0.759)	0.567 (0.202 - 0.933)	0.058 (-0.018 - 0.134)	0.169 (0.067 - 0.27)	0.213 (0.112 - 0.314)	0.014 (0.003 - 0.024)	0.035 (0.023 - 0.047)	0.042 (0.03 - 0.053)
Alauda arvensis	Eurasian Skylark	open	open	0.124 (0.038 - 0.21)	0.202 (0.097 - 0.307)	0.082 (0.027 - 0.137)	0.136 (0.062 - 0.21)	0.202 (0.123 - 0.281)	0.096 (0.043 - 0.148)	0.077 (0.051 - 0.103)	0.105 (0.082 - 0.129)	0.057 (0.038 - 0.076)	0.154 (-0.082 - 0.389)	0.114 (-0.086 - 0.314)	0.004 (-0.059 - 0.067)	0.262 (-0.047 - 0.571)	0.205 (-0.078 - 0.488)	0.008 (-0.119 - 0.136)	0.233 (0.058 - 0.408)	0.191 (0.025 - 0.357)	0.009 (-0.071 - 0.09)	0.111 (0.023 - 0.198)	0.238 (0.107 - 0.368)	0.092 (0.028 - 0.156)	0.133 (0.051 - 0.214)	0.246 (0.148 - 0.345)	0.113 (0.052 - 0.175)	0.082 (0.054 - 0.111)	0.135 (0.105 - 0.164)	0.072 (0.051 - 0.094)	0.842 (-1.255 - 2.939)	0.462 (-0.581 - 1.506)	0.524 (-0.371 - 1.418)	0.421 (-0.3 - 1.143)	0.274 (-0.17 - 0.719)	0.3 (-0.062 - 0.663)	0.117 (0.002 - 0.231)	0.087 (0.002 - 0.173)	0.093 (0.028 - 0.158)
Alectoris rufa	Red-legged Partridge	open	open	0.067 (-0.049 - 0.183)	0.187 (-0.004 - 0.378)	0.138 (-0.01 - 0.285)	0.065 (-0.022 - 0.152)	0.156 (0.037 - 0.274)	0.121 (0.023 - 0.218)	0.032 (0.009 - 0.055)	0.067 (0.037 - 0.097)	0.055 (0.029 - 0.08)	NA	NA	NA	NA	NA	NA	NA	NA	NA	0.042 (-0.251 - 0.335)	0.02 (-0.136 - 0.176)	0.554 (-1.075 - 2.184)	0.043 (-0.213 - 0.299)	0.022 (-0.129 - 0.173)	0.328 (-0.333 - 0.989)	0.022 (-0.073 - 0.118)	0.012 (-0.046 - 0.071)	0.107 (-0.009 - 0.223)	0.32 (-0.029 - 0.668)	0.651 (0.113 - 1.189)	0.385 (0.069 - 0.702)	0.253 (0.042 - 0.464)	0.444 (0.18 - 0.708)	0.294 (0.114 - 0.474)	0.104 (0.056 - 0.152)	0.16 (0.108 - 0.212)	0.117 (0.078 - 0.157)
Anthus pratensis	Meadow Pipit	open	open	0.223 (0.067 - 0.379)	0.166 (0.047 - 0.284)	0.066 (-0.001 - 0.133)	0.162 (0.08 - 0.245)	0.129 (0.06 - 0.197)	0.06 (0.012 - 0.108)	0.062 (0.045 - 0.08)	0.052 (0.037 - 0.067)	0.028 (0.015 - 0.04)	0.022 (-0.041 - 0.084)	-0.005 (-0.03 - 0.019)	0.025 (-0.034 - 0.085)	0.026 (-0.031 - 0.083)	-0.007 (-0.029 - 0.015)	0.03 (-0.025 - 0.084)	0.015 (-0.006 - 0.037)	-0.005 (-0.008 - -0.001)	0.018 (-0.005 - 0.04)	0.32 (0.062 - 0.579)	0.378 (0.093 - 0.663)	0.14 (-0.005 - 0.285)	0.196 (0.08 - 0.312)	0.223 (0.1 - 0.345)	0.1 (0.022 - 0.178)	0.063 (0.04 - 0.086)	0.069 (0.045 - 0.094)	0.037 (0.02 - 0.054)	NA	NA	NA	NA	NA	NA	NA	NA	NA
Bubulcus ibis	Cattle Egret	open	open	201.833 (-1274.708 - 1678.375)	0.036 (-0.336 - 0.408)	1.07 (-4.937 - 7.076)	12.575 (-41.786 - 66.935)	0.051 (-0.361 - 0.463)	0.539 (-1.351 - 2.428)	0.644 (-0.362 - 1.651)	0.037 (-0.183 - 0.258)	0.169 (-0.116 - 0.454)	NA	NA	NA	NA	NA	NA	NA	NA	NA	561608.083 (-9078195.156 - 10201411.322)	0.298 (-4.733 - 5.329)	-0.006 (-0.061 - 0.049)	1193.815 (-10870.446 - 13258.075)	0.215 (-2.152 - 2.582)	-0.013 (-0.178 - 0.151)	2.43 (-5.313 - 10.173)	0.091 (-0.44 - 0.622)	-0.016 (-0.24 - 0.208)	1.036 (-7.942 - 10.013)	-0.012 (-0.07 - 0.045)	1.302 (-6.215 - 8.819)	0.515 (-2.323 - 3.352)	-0.023 (-0.17 - 0.123)	0.595 (-1.565 - 2.755)	0.154 (-0.281 - 0.59)	-0.023 (-0.195 - 0.15)	0.167 (-0.128 - 0.462)
Burhinus oedicnemus	Eurasian Thick-knee	open	open	0.008 (-0.444 - 0.46)	-0.02 (-0.125 - 0.084)	-0.032 (-0.019 - -0.044)	0.013 (-0.664 - 0.689)	-0.039 (-0.312 - 0.234)	-0.08 (-0.112 - -0.048)	0.01 (-0.501 - 0.521)	-0.04 (-0.389 - 0.31)	-0.119 (-0.328 - 0.09)	NA	NA	NA	NA	NA	NA	NA	NA	NA	NA	NA	NA	NA	NA	NA	NA	NA	NA	-0.025 (-0.047 - -0.002)	0.041 (-0.641 - 0.724)	-0.027 (-0.018 - -0.036)	-0.061 (-0.212 - 0.09)	0.061 (-0.772 - 0.893)	-0.072 (-0.119 - -0.025)	-0.081 (-0.439 - 0.277)	0.046 (-0.45 - 0.541)	-0.109 (-0.335 - 0.116)
Calandrella brachydactyla	Greater Short-toed Lark	open	open	0.095 (-0.762 - 0.952)	-0.024 (-0.015 - -0.033)	-0.026 (-0.007 - -0.045)	0.089 (-0.519 - 0.697)	-0.047 (-0.056 - -0.037)	-0.059 (-0.034 - -0.084)	0.044 (-0.155 - 0.242)	-0.051 (-0.089 - -0.014)	-0.097 (-0.096 - -0.098)	NA	NA	NA	NA	NA	NA	NA	NA	NA	325115.148 (-16832198.758 - 17482429.053)	-0.002 (0.003 - -0.006)	5.70517650009415e+40 (-5.82074322752005e+42 - 5.93484675752194e+42)	620.756 (-18652.137 - 19893.649)	-0.008 (0.007 - -0.023)	3.34832621548745e+23 (-1.99591696987578e+25 - 2.06288349418553e+25)	1.145 (-9.903 - 12.192)	-0.04 (0.007 - -0.087)	1965108.041 (-33826000.181 - 37756216.263)	-0.003 (-0.214 - 0.208)	-0.032 (-0.018 - -0.046)	-0.034 (-0.01 - -0.058)	-0.004 (-0.288 - 0.28)	-0.06 (-0.069 - -0.05)	-0.073 (-0.045 - -0.101)	-0.003 (-0.19 - 0.184)	-0.063 (-0.117 - -0.008)	-0.117 (-0.129 - -0.104)
Ciconia ciconia	White Stork	open	open	0.433 (-0.838 - 1.704)	-0.094 (-0.109 - -0.078)	0.168 (-0.255 - 0.59)	0.264 (-0.323 - 0.851)	-0.112 (-0.165 - -0.059)	0.122 (-0.131 - 0.376)	0.085 (-0.041 - 0.21)	-0.071 (-0.121 - -0.021)	0.046 (-0.021 - 0.113)	1.659 (-7.673 - 10.99)	-0.212 (-0.466 - 0.043)	9.215 (-26.125 - 44.555)	0.93 (-2.926 - 4.785)	-0.235 (-0.731 - 0.262)	3.068 (-4.598 - 10.733)	0.278 (-0.48 - 1.037)	-0.135 (-0.496 - 0.226)	0.597 (-0.198 - 1.393)	2.715 (-6.491 - 11.92)	-0.099 (-0.072 - -0.126)	0.104 (-0.353 - 0.562)	0.943 (-1.149 - 3.035)	-0.149 (-0.131 - -0.167)	0.081 (-0.221 - 0.382)	0.19 (-0.033 - 0.414)	-0.158 (-0.183 - -0.133)	0.032 (-0.056 - 0.12)	0.065 (-0.477 - 0.608)	0.143 (-0.45 - 0.736)	0.187 (-0.399 - 0.773)	0.051 (-0.324 - 0.425)	0.101 (-0.244 - 0.447)	0.127 (-0.19 - 0.445)	0.02 (-0.094 - 0.134)	0.037 (-0.05 - 0.124)	0.045 (-0.028 - 0.117)
Corvus frugilegus	Rook	open	open	-0.01 (-0.036 - 0.016)	0.092 (-0.181 - 0.366)	0.133 (-0.223 - 0.489)	-0.021 (-0.087 - 0.046)	0.108 (-0.128 - 0.344)	0.142 (-0.128 - 0.411)	-0.022 (-0.095 - 0.051)	0.067 (-0.023 - 0.157)	0.081 (-0.01 - 0.172)	-0.021 (0.02 - -0.062)	1.947 (-38.769 - 42.663)	555.774 (-9670.81 - 10782.358)	-0.044 (0.013 - -0.1)	0.588 (-7.075 - 8.251)	17.414 (-172.25 - 207.079)	-0.091 (0.004 - -0.186)	0.112 (-0.572 - 0.795)	0.457 (-1.339 - 2.254)	0.014 (-0.094 - 0.122)	0.056 (-0.133 - 0.245)	0.103 (-0.191 - 0.396)	0.024 (-0.132 - 0.179)	0.074 (-0.121 - 0.269)	0.118 (-0.129 - 0.366)	0.02 (-0.083 - 0.123)	0.051 (-0.039 - 0.142)	0.073 (-0.021 - 0.167)	NA	NA	NA	NA	NA	NA	NA	NA	NA
Coturnix coturnix	Common Quail	open	open	0.401 (-0.187 - 0.989)	0.259 (-0.106 - 0.623)	0.089 (-0.11 - 0.288)	0.28 (-0.03 - 0.59)	0.198 (-0.021 - 0.417)	0.08 (-0.076 - 0.236)	0.103 (0.03 - 0.177)	0.079 (0.021 - 0.137)	0.037 (-0.017 - 0.091)	8.876 (-68.563 - 86.316)	-0.175 (-0.029 - -0.32)	203.164 (-1507.851 - 1914.18)	2.721 (-12.42 - 17.861)	-0.296 (-0.168 - -0.424)	18.519 (-74.801 - 111.839)	0.504 (-0.969 - 1.978)	-0.474 (-0.426 - -0.523)	1.24 (-1.329 - 3.809)	0.984 (-0.5 - 2.468)	0.203 (-0.183 - 0.588)	-0.052 (-0.126 - 0.022)	0.521 (-0.03 - 1.072)	0.155 (-0.084 - 0.393)	-0.057 (-0.156 - 0.042)	0.151 (0.056 - 0.245)	0.061 (-0.006 - 0.128)	-0.032 (-0.091 - 0.026)	0.043 (-0.28 - 0.366)	1.349 (-1.046 - 3.745)	0.687 (-0.382 - 1.757)	0.044 (-0.26 - 0.348)	0.725 (-0.149 - 1.598)	0.449 (-0.046 - 0.944)	0.023 (-0.103 - 0.149)	0.217 (0.076 - 0.358)	0.158 (0.06 - 0.256)
Crex crex	Corncrake	semi-open	open	NA	NA	NA	NA	NA	NA	NA	NA	NA	-0.157 (-0.289 - -0.025)	-0.19 (-0.225 - -0.155)	2.922 (-6.347 - 12.191)	-0.149 (-0.335 - 0.037)	-0.193 (-0.305 - -0.08)	1.147 (-1.348 - 3.642)	-0.073 (-0.142 - -0.004)	-0.103 (-0.154 - -0.051)	0.249 (-0.044 - 0.543)	NA	NA	NA	NA	NA	NA	NA	NA	NA	NA	NA	NA	NA	NA	NA	NA	NA	NA
Emberiza calandra	Corn Bunting	open	open	0.054 (-0.052 - 0.16)	0.096 (-0.037 - 0.229)	0.303 (0.047 - 0.56)	0.059 (-0.04 - 0.158)	0.098 (-0.012 - 0.208)	0.249 (0.096 - 0.402)	0.033 (-0.002 - 0.069)	0.052 (0.016 - 0.087)	0.108 (0.072 - 0.145)	NA	NA	NA	NA	NA	NA	NA	NA	NA	-0.008 (-0.096 - 0.08)	-0.001 (-0.094 - 0.093)	0.811 (-0.531 - 2.154)	-0.01 (-0.12 - 0.1)	-0.001 (-0.111 - 0.109)	0.484 (-0.062 - 1.03)	-0.006 (-0.062 - 0.05)	0 (-0.053 - 0.053)	0.16 (0.063 - 0.257)	0.242 (-0.08 - 0.563)	0.412 (-0.034 - 0.858)	0.436 (0.072 - 0.799)	0.241 (-0.01 - 0.492)	0.367 (0.073 - 0.66)	0.383 (0.15 - 0.615)	0.125 (0.041 - 0.21)	0.173 (0.089 - 0.256)	0.178 (0.115 - 0.241)
Falco naumanni	Lesser Kestrel	open	open	-0.019 (-0.003 - -0.034)	0.033 (-0.429 - 0.494)	1.418 (-7.718 - 10.554)	-0.052 (-0.041 - -0.063)	0.045 (-0.474 - 0.564)	0.655 (-1.979 - 3.289)	-0.094 (-0.183 - -0.005)	0.032 (-0.253 - 0.316)	0.188 (-0.175 - 0.551)	NA	NA	NA	NA	NA	NA	NA	NA	NA	NA	NA	NA	NA	NA	NA	NA	NA	NA	-0.019 (-0.003 - -0.034)	0.033 (-0.429 - 0.494)	1.418 (-7.718 - 10.554)	-0.052 (-0.041 - -0.063)	0.045 (-0.474 - 0.564)	0.655 (-1.979 - 3.289)	-0.094 (-0.183 - -0.005)	0.032 (-0.253 - 0.316)	0.188 (-0.175 - 0.551)
Falco tinnunculus	Common Kestrel	open	open	0.214 (-0.023 - 0.451)	0.428 (0.094 - 0.761)	0.032 (-0.081 - 0.145)	0.173 (0.019 - 0.327)	0.311 (0.127 - 0.495)	0.03 (-0.062 - 0.121)	0.072 (0.036 - 0.108)	0.117 (0.08 - 0.155)	0.014 (-0.01 - 0.038)	0.698 (-0.817 - 2.212)	1.008 (-0.967 - 2.983)	-0.112 (-0.317 - 0.093)	0.391 (-0.282 - 1.063)	0.523 (-0.262 - 1.309)	-0.092 (-0.287 - 0.103)	0.114 (-0.005 - 0.233)	0.143 (0.016 - 0.27)	-0.039 (-0.096 - 0.018)	-0.136 (-0.18 - -0.091)	0.17 (-0.163 - 0.503)	0.141 (-0.154 - 0.435)	-0.149 (-0.214 - -0.085)	0.136 (-0.083 - 0.354)	0.114 (-0.085 - 0.314)	-0.085 (-0.113 - -0.058)	0.055 (0.004 - 0.107)	0.048 (0 - 0.095)	0.718 (0.065 - 1.372)	0.85 (0.204 - 1.497)	-0.007 (-0.085 - 0.07)	0.54 (0.182 - 0.898)	0.612 (0.279 - 0.945)	-0.009 (-0.104 - 0.086)	0.216 (0.13 - 0.303)	0.236 (0.162 - 0.311)	-0.005 (-0.053 - 0.042)
Falco vespertinus	Red-footed Falcon	open	open	-0.011 (0.014 - -0.036)	27539849171275536 (-1803042536510819328 - 1858122234853370112)	0.552 (-43.598 - 44.702)	-0.034 (0.01 - -0.078)	2216334864.247 (-84487159061.738 - 88919828790.232)	0.304 (-15.225 - 15.833)	-0.101 (-0.056 - -0.146)	178.263 (-1921.951 - 2278.478)	0.101 (-2.649 - 2.851)	NA	NA	NA	NA	NA	NA	NA	NA	NA	27.593 (-2155.575 - 2210.761)	11055432.889 (-893221979.471 - 915332845.25)	-0.014 (0.02 - -0.048)	3.328 (-153.245 - 159.9)	6650.331 (-313421.182 - 326721.845)	-0.039 (0.017 - -0.095)	0.303 (-5.358 - 5.964)	3.893 (-53.919 - 61.704)	-0.096 (-0.215 - 0.022)	NA	NA	NA	NA	NA	NA	NA	NA	NA
Galerida cristata	Crested Lark	open	open	0.073 (-0.101 - 0.246)	0.168 (-0.103 - 0.44)	-0.012 (-0.034 - 0.01)	0.094 (-0.081 - 0.269)	0.183 (-0.03 - 0.395)	-0.022 (-0.066 - 0.022)	0.063 (-0.006 - 0.133)	0.105 (0.039 - 0.172)	-0.021 (-0.048 - 0.007)	NA	NA	NA	NA	NA	NA	NA	NA	NA	-0.064 (-0.037 - -0.09)	3.227 (-12.143 - 18.598)	-0.044 (-0.119 - 0.031)	-0.107 (-0.098 - -0.116)	1.075 (-2.177 - 4.326)	-0.058 (-0.202 - 0.086)	-0.111 (-0.15 - -0.071)	0.216 (-0.101 - 0.533)	-0.04 (-0.151 - 0.072)	0.508 (-0.35 - 1.367)	0.356 (-0.168 - 0.88)	-0.004 (-0.033 - 0.026)	0.493 (-0.065 - 1.052)	0.385 (-0.003 - 0.774)	-0.008 (-0.075 - 0.059)	0.269 (0.101 - 0.436)	0.23 (0.099 - 0.361)	-0.009 (-0.074 - 0.056)
Hirundo rustica	Barn Swallow	open	open	0.098 (0.012 - 0.184)	0.174 (0.068 - 0.28)	0.035 (-0.021 - 0.092)	0.095 (0.022 - 0.168)	0.16 (0.079 - 0.241)	0.036 (-0.017 - 0.09)	0.047 (0.024 - 0.071)	0.075 (0.051 - 0.099)	0.019 (0.001 - 0.037)	0.103 (-0.083 - 0.289)	0.17 (-0.073 - 0.414)	0.156 (-0.068 - 0.38)	0.112 (-0.059 - 0.283)	0.177 (-0.032 - 0.386)	0.163 (-0.031 - 0.358)	0.062 (0.007 - 0.118)	0.094 (0.026 - 0.162)	0.088 (0.025 - 0.15)	0.027 (-0.06 - 0.113)	0.097 (-0.02 - 0.214)	-0.065 (-0.099 - -0.031)	0.028 (-0.059 - 0.116)	0.097 (-0.006 - 0.199)	-0.08 (-0.129 - -0.031)	0.016 (-0.02 - 0.051)	0.049 (0.013 - 0.086)	-0.051 (-0.077 - -0.025)	0.108 (-0.106 - 0.323)	0.216 (-0.033 - 0.465)	0.146 (-0.026 - 0.319)	0.107 (-0.082 - 0.296)	0.198 (0.006 - 0.391)	0.14 (-0.002 - 0.283)	0.054 (-0.014 - 0.122)	0.094 (0.034 - 0.154)	0.069 (0.023 - 0.115)
Limosa limosa	Black-tailed Godwit	open	open	0.674 (-3.943 - 5.292)	-0.007 (-0.026 - 0.013)	0.02 (-0.221 - 0.261)	0.332 (-1.099 - 1.763)	-0.013 (-0.067 - 0.04)	0.027 (-0.233 - 0.287)	0.1 (-0.101 - 0.301)	-0.014 (-0.068 - 0.04)	0.019 (-0.102 - 0.14)	NA	NA	NA	NA	NA	NA	NA	NA	NA	2.069 (-12.22 - 16.359)	0.002 (-0.059 - 0.062)	-0.001 (-0.061 - 0.06)	0.697 (-2.233 - 3.626)	0.003 (-0.105 - 0.111)	-0.001 (-0.121 - 0.118)	0.157 (-0.125 - 0.439)	0.003 (-0.077 - 0.082)	-0.001 (-0.103 - 0.1)	NA	NA	NA	NA	NA	NA	NA	NA	NA
Melanocorypha calandra	Calandra Lark	open	open	12.952 (-59.291 - 85.195)	1.939 (-6.194 - 10.073)	0.028 (-0.13 - 0.186)	2.686 (-6.27 - 11.641)	0.848 (-1.338 - 3.033)	0.044 (-0.155 - 0.243)	0.402 (-0.144 - 0.949)	0.238 (-0.044 - 0.52)	0.036 (-0.085 - 0.156)	NA	NA	NA	NA	NA	NA	NA	NA	NA	9.424561918858e+32 (-5.46339383812979e+34 - 5.65188507650695e+34)	-0.008 (0.03 - -0.045)	8410663099.482 (-589709752581.969 - 606531078780.934)	10455877496828930048 (-3.52461623065309e+20 - 3.73373378058967e+20)	-0.024 (0.047 - -0.095)	288982.581 (-11805653.483 - 12383618.645)	116000.409 (-1100395.063 - 1332395.882)	-0.074 (0.027 - -0.176)	9.855 (-115.36 - 135.07)	1.469 (-6.814 - 9.752)	1.904 (-5.996 - 9.804)	0.015 (-0.069 - 0.099)	0.595 (-1.485 - 2.675)	0.698 (-1.102 - 2.497)	0.025 (-0.079 - 0.129)	0.158 (-0.094 - 0.41)	0.17 (-0.038 - 0.379)	0.021 (-0.026 - 0.068)
Monticola solitarius	Blue Rock-thrush	open	open	NA	NA	NA	NA	NA	NA	NA	NA	NA	NA	NA	NA	NA	NA	NA	NA	NA	NA	194331927.65 (-4059316745.716 - 4447980601.015)	-0.084 (-0.001 - -0.166)	-0.083 (-0.009 - -0.157)	30046.438 (-355617.021 - 415709.897)	-0.093 (-0.027 - -0.159)	-0.089 (-0.072 - -0.105)	4.542 (-13.364 - 22.449)	-0.101 (-0.017 - -0.185)	-0.063 (-0.125 - -0.002)	-0.093 (-0.344 - 0.157)	-0.066 (-0.293 - 0.16)	-0.164 (-0.22 - -0.108)	-0.063 (-0.254 - 0.128)	-0.043 (-0.204 - 0.117)	-0.121 (-0.194 - -0.048)	-0.022 (-0.072 - 0.029)	-0.014 (-0.052 - 0.023)	-0.046 (-0.067 - -0.024)
Motacilla flava	Western Yellow Wagtail	open	open	0.174 (-0.007 - 0.355)	0.253 (0.008 - 0.498)	0.023 (-0.03 - 0.076)	0.15 (0.033 - 0.267)	0.201 (0.059 - 0.343)	0.025 (-0.024 - 0.074)	0.067 (0.039 - 0.096)	0.084 (0.052 - 0.116)	0.014 (-0.001 - 0.029)	0.12 (-0.044 - 0.284)	0.4 (-0.07 - 0.869)	0.026 (-0.029 - 0.081)	0.092 (-0.008 - 0.192)	0.246 (0.016 - 0.475)	0.023 (-0.014 - 0.059)	0.036 (0.006 - 0.066)	0.08 (0.018 - 0.141)	0.01 (0 - 0.02)	0.229 (-0.228 - 0.686)	0.041 (-0.108 - 0.189)	-0.028 (-0.072 - 0.016)	0.198 (-0.102 - 0.498)	0.046 (-0.103 - 0.195)	-0.039 (-0.112 - 0.033)	0.09 (0.003 - 0.178)	0.026 (-0.038 - 0.091)	-0.028 (-0.077 - 0.021)	188.629 (-1263.575 - 1640.833)	22.943 (-96.313 - 142.198)	-0.019 (-0.008 - -0.029)	11.232 (-39.887 - 62.351)	3.219 (-6.766 - 13.203)	-0.047 (-0.038 - -0.056)	0.542 (-0.361 - 1.445)	0.333 (-0.079 - 0.744)	-0.077 (-0.105 - -0.048)
Oenanthe leucura	Black Wheatear	open	open	19.757 (-76.193 - 115.708)	1.903 (-7.461 - 11.268)	1.383 (-5.24 - 8.006)	3.015 (-5.766 - 11.797)	0.708 (-1.491 - 2.906)	0.576 (-1.204 - 2.356)	0.321 (-0.055 - 0.697)	0.158 (-0.065 - 0.38)	0.141 (-0.074 - 0.355)	NA	NA	NA	NA	NA	NA	NA	NA	NA	NA	NA	NA	NA	NA	NA	NA	NA	NA	19.757 (-76.193 - 115.708)	1.903 (-7.461 - 11.268)	1.383 (-5.24 - 8.006)	3.015 (-5.766 - 11.797)	0.708 (-1.491 - 2.906)	0.576 (-1.204 - 2.356)	0.321 (-0.055 - 0.697)	0.158 (-0.065 - 0.38)	0.141 (-0.074 - 0.355)
Otis tarda	Great Bustard	open	open	104623309470.015 (-1844728010405.81 - 2053974629345.84)	0.015 (-0.166 - 0.196)	-0.002 (-0.003 - 0)	1613499.883 (-16095084.175 - 19322083.942)	0.034 (-0.262 - 0.33)	-0.008 (-0.035 - 0.018)	24.788 (-58.146 - 107.723)	0.042 (-0.185 - 0.27)	-0.023 (-0.144 - 0.098)	NA	NA	NA	NA	NA	NA	NA	NA	NA	NA	NA	NA	NA	NA	NA	NA	NA	NA	44957066279.562 (-776614024157.691 - 866528156716.816)	0.016 (-0.178 - 0.21)	-0.002 (-0.004 - 0.001)	940414.062 (-9186582.518 - 11067410.642)	0.035 (-0.258 - 0.328)	-0.007 (-0.035 - 0.02)	19.585 (-45.189 - 84.358)	0.041 (-0.16 - 0.241)	-0.019 (-0.119 - 0.081)
Passer montanus	Eurasian Tree Sparrow	semi-open	open	0.029 (-0.066 - 0.124)	0.016 (-0.072 - 0.104)	-0.01 (-0.078 - 0.059)	0.028 (-0.056 - 0.113)	0.016 (-0.066 - 0.098)	-0.01 (-0.082 - 0.062)	0.014 (-0.017 - 0.045)	0.008 (-0.024 - 0.04)	-0.005 (-0.036 - 0.026)	-0.123 (-0.134 - -0.112)	-0.052 (-0.158 - 0.053)	-0.118 (-0.138 - -0.097)	-0.162 (-0.227 - -0.096)	-0.059 (-0.205 - 0.087)	-0.152 (-0.228 - -0.075)	-0.111 (-0.151 - -0.07)	-0.034 (-0.098 - 0.031)	-0.102 (-0.147 - -0.057)	0.057 (-0.104 - 0.217)	-0.05 (-0.096 - -0.003)	0.012 (-0.126 - 0.15)	0.053 (-0.079 - 0.186)	-0.059 (-0.126 - 0.008)	0.012 (-0.12 - 0.145)	0.026 (-0.018 - 0.07)	-0.036 (-0.073 - 0.001)	0.006 (-0.046 - 0.059)	0.416 (-0.833 - 1.665)	0.036 (-0.155 - 0.227)	-0.021 (-0.068 - 0.025)	0.29 (-0.328 - 0.909)	0.04 (-0.148 - 0.228)	-0.03 (-0.106 - 0.047)	0.11 (-0.032 - 0.253)	0.022 (-0.061 - 0.106)	-0.021 (-0.073 - 0.032)
Perdix perdix	Grey Partridge	open	open	NA	NA	NA	NA	NA	NA	NA	NA	NA	418072805.27 (-5035230127.064 - 5871375737.603)	1.288 (-13.522 - 16.097)	0.064 (-1.372 - 1.5)	87103.672 (-582962.251 - 757169.594)	0.737 (-4.891 - 6.364)	0.075 (-1.352 - 1.502)	17.812 (-25.217 - 60.842)	0.241 (-0.742 - 1.224)	0.044 (-0.591 - 0.68)	-0.067 (-0.077 - -0.058)	0.002 (-0.278 - 0.282)	3.075 (-5.004 - 11.154)	-0.113 (-0.182 - -0.044)	0.002 (-0.325 - 0.33)	1.198 (-0.819 - 3.215)	-0.105 (-0.233 - 0.024)	0.001 (-0.186 - 0.189)	0.279 (0.034 - 0.523)	5.36363001885569e+20 (-2.7161950027977e+22 - 2.82346760317482e+22)	3818083.758 (-117231968.566 - 124868136.082)	-0.265 (0.243 - -0.773)	764453720702.577 (-22469757434164.3 - 23998664875569.5)	3640.818 (-64280.69 - 71562.327)	-0.224 (0.04 - -0.488)	1089.352 (-8909.425 - 11088.128)	3.283 (-16.191 - 22.757)	-0.189 (-0.024 - -0.355)
Petronia petronia	Rock Sparrow	open	open	NA	NA	NA	NA	NA	NA	NA	NA	NA	NA	NA	NA	NA	NA	NA	NA	NA	NA	-0.043 (-0.59 - 0.504)	-0.051 (-0.44 - 0.338)	1.223 (-19.073 - 21.519)	-0.057 (-0.912 - 0.799)	-0.07 (-0.759 - 0.62)	0.656 (-6.698 - 8.01)	-0.039 (-0.557 - 0.48)	-0.049 (-0.506 - 0.408)	0.197 (-0.963 - 1.357)	-0.068 (-0.144 - 0.009)	0.181 (-0.254 - 0.617)	0.16 (-0.225 - 0.545)	-0.062 (-0.159 - 0.034)	0.116 (-0.109 - 0.34)	0.104 (-0.1 - 0.308)	-0.03 (-0.074 - 0.015)	0.038 (-0.008 - 0.085)	0.035 (-0.008 - 0.077)
Pterocles alchata	Pin-tailed Sandgrouse	open	open	-0.057 (0.052 - -0.166)	-0.058 (0.124 - -0.24)	-0.058 (0.124 - -0.24)	-0.119 (-0.437 - 0.198)	-0.13 (0.108 - -0.368)	-0.13 (0.108 - -0.368)	-0.154 (-2.141 - 1.833)	-0.291 (-0.125 - -0.457)	-0.291 (-0.125 - -0.457)	NA	NA	NA	NA	NA	NA	NA	NA	NA	NA	NA	NA	NA	NA	NA	NA	NA	NA	-0.057 (0.052 - -0.166)	-0.058 (0.124 - -0.24)	-0.058 (0.124 - -0.24)	-0.119 (-0.437 - 0.198)	-0.13 (0.108 - -0.368)	-0.13 (0.108 - -0.368)	-0.154 (-2.141 - 1.833)	-0.291 (-0.125 - -0.457)	-0.291 (-0.125 - -0.457)
Pterocles orientalis	Black-bellied Sandgrouse	open	open	-0.24 (0.246 - -0.727)	-0.24 (0.246 - -0.727)	122.156 (-2744.536 - 2988.849)	-0.257 (0.048 - -0.561)	-0.257 (0.048 - -0.561)	9.781 (-128.363 - 147.925)	-0.27 (-0.178 - -0.363)	-0.272 (-0.172 - -0.372)	0.549 (-2.765 - 3.863)	NA	NA	NA	NA	NA	NA	NA	NA	NA	NA	NA	NA	NA	NA	NA	NA	NA	NA	-0.24 (0.246 - -0.727)	-0.24 (0.246 - -0.727)	122.156 (-2744.536 - 2988.849)	-0.257 (0.048 - -0.561)	-0.257 (0.048 - -0.561)	9.781 (-128.363 - 147.925)	-0.27 (-0.178 - -0.363)	-0.272 (-0.172 - -0.372)	0.549 (-2.765 - 3.863)
Sturnus unicolor	Spotless Starling	semi-open	open	-0.085 (-0.135 - -0.036)	-0.106 (-0.119 - -0.094)	0.175 (-0.076 - 0.427)	-0.118 (-0.214 - -0.023)	-0.157 (-0.203 - -0.112)	0.174 (-0.031 - 0.379)	-0.085 (-0.15 - -0.02)	-0.122 (-0.159 - -0.085)	0.089 (0.024 - 0.154)	NA	NA	NA	NA	NA	NA	NA	NA	NA	0.027 (-0.109 - 0.163)	0.014 (-0.073 - 0.101)	0.252 (-0.258 - 0.763)	0.033 (-0.116 - 0.181)	0.018 (-0.088 - 0.123)	0.212 (-0.103 - 0.527)	0.02 (-0.034 - 0.074)	0.011 (-0.032 - 0.054)	0.095 (0.005 - 0.185)	-0.116 (-0.204 - -0.029)	-0.14 (-0.166 - -0.114)	0.295 (-0.174 - 0.763)	-0.147 (-0.294 - -0.001)	-0.187 (-0.255 - -0.119)	0.257 (-0.066 - 0.58)	-0.096 (-0.181 - -0.011)	-0.13 (-0.172 - -0.088)	0.115 (0.031 - 0.199)
Sturnus vulgaris	Common Starling	open	open	-0.086 (-0.109 - -0.062)	-0.044 (-0.085 - -0.003)	-0.04 (-0.083 - 0.002)	-0.104 (-0.14 - -0.068)	-0.05 (-0.099 - -0.001)	-0.045 (-0.095 - 0.004)	-0.065 (-0.082 - -0.048)	-0.029 (-0.048 - -0.009)	-0.026 (-0.045 - -0.006)	-0.003 (-0.083 - 0.076)	0.24 (-0.1 - 0.58)	-0.11 (-0.081 - -0.14)	-0.004 (-0.088 - 0.08)	0.253 (-0.024 - 0.531)	-0.18 (-0.141 - -0.22)	-0.003 (-0.029 - 0.023)	0.138 (0.036 - 0.241)	-0.154 (-0.102 - -0.205)	-0.111 (-0.127 - -0.095)	-0.085 (-0.113 - -0.056)	0.047 (-0.058 - 0.152)	-0.148 (-0.182 - -0.114)	-0.106 (-0.15 - -0.062)	0.048 (-0.048 - 0.144)	-0.103 (-0.124 - -0.082)	-0.068 (-0.089 - -0.047)	0.025 (-0.007 - 0.057)	0.021 (-0.115 - 0.157)	-0.009 (-0.101 - 0.083)	-0.039 (-0.08 - 0.002)	0.019 (-0.082 - 0.12)	-0.009 (-0.084 - 0.067)	-0.04 (-0.079 - -0.001)	0.009 (-0.014 - 0.032)	-0.004 (-0.021 - 0.012)	-0.021 (-0.026 - -0.016)
Tetrax tetrax	Little Bustard	open	open	0.083 (-2.204 - 2.37)	0.152 (-1.518 - 1.822)	0.01 (-0.364 - 0.384)	0.087 (-1.833 - 2.007)	0.14 (-1.008 - 1.287)	0.013 (-0.451 - 0.477)	0.047 (-0.766 - 0.86)	0.068 (-0.323 - 0.458)	0.009 (-0.282 - 0.299)	NA	NA	NA	NA	NA	NA	NA	NA	NA	NA	NA	NA	NA	NA	NA	NA	NA	NA	0.057 (-1.679 - 1.793)	0.011 (-0.324 - 0.346)	0.274 (-2.342 - 2.89)	0.07 (-1.649 - 1.788)	0.016 (-0.441 - 0.474)	0.23 (-1.29 - 1.75)	0.044 (-0.816 - 0.904)	0.012 (-0.304 - 0.329)	0.106 (-0.327 - 0.538)
Tyto alba	Common Barn-owl	open	open	NA	NA	NA	NA	NA	NA	NA	NA	NA	NA	NA	NA	NA	NA	NA	NA	NA	NA	NA	NA	NA	NA	NA	NA	NA	NA	NA	NA	NA	NA	NA	NA	NA	NA	NA	NA
Upupa epops	Common Hoopoe	open	open	0.254 (-0.032 - 0.54)	0.145 (-0.03 - 0.319)	0.033 (-0.076 - 0.142)	0.172 (0.011 - 0.333)	0.104 (-0.004 - 0.213)	0.026 (-0.054 - 0.106)	0.06 (0.024 - 0.096)	0.039 (0.013 - 0.065)	0.01 (-0.011 - 0.032)	-0.142 (-0.518 - 0.234)	26573.347 (-253692.83 - 306839.524)	8.94 (-73.046 - 90.927)	-0.123 (-0.691 - 0.445)	237.432 (-1250.355 - 1725.219)	1.955 (-9.577 - 13.487)	-0.056 (-0.383 - 0.271)	1.862 (-2.322 - 6.046)	0.257 (-0.535 - 1.05)	0.835 (-0.237 - 1.907)	0.128 (-0.114 - 0.369)	-0.005 (-0.138 - 0.127)	0.398 (0.017 - 0.78)	0.081 (-0.053 - 0.215)	-0.004 (-0.096 - 0.088)	0.1 (0.044 - 0.157)	0.027 (-0.001 - 0.054)	-0.001 (-0.024 - 0.021)	-0.072 (-0.184 - 0.04)	0.015 (-0.15 - 0.18)	-0.045 (-0.153 - 0.063)	-0.068 (-0.189 - 0.053)	0.013 (-0.13 - 0.157)	-0.041 (-0.149 - 0.067)	-0.033 (-0.085 - 0.02)	0.006 (-0.045 - 0.057)	-0.019 (-0.062 - 0.023)
Vanellus vanellus	Northern Lapwing	open	open	0.126 (-0.037 - 0.289)	0.056 (-0.044 - 0.157)	0.855 (0.072 - 1.639)	0.107 (-0.002 - 0.215)	0.054 (-0.027 - 0.135)	0.449 (0.172 - 0.725)	0.047 (0.017 - 0.076)	0.026 (0 - 0.053)	0.131 (0.089 - 0.174)	0.024 (-0.128 - 0.175)	0.061 (-0.143 - 0.265)	-0.049 (-0.115 - 0.017)	0.031 (-0.154 - 0.216)	0.076 (-0.151 - 0.303)	-0.072 (-0.184 - 0.039)	0.021 (-0.054 - 0.095)	0.048 (-0.041 - 0.137)	-0.055 (-0.105 - -0.005)	0.12 (-0.081 - 0.321)	-0.006 (-0.043 - 0.032)	1.853 (-0.461 - 4.166)	0.11 (-0.03 - 0.251)	-0.008 (-0.06 - 0.045)	0.747 (0.155 - 1.339)	0.053 (0.009 - 0.097)	-0.005 (-0.038 - 0.027)	0.182 (0.112 - 0.253)	-0.087 (0.09 - -0.264)	2922.36 (-106349.395 - 112194.114)	-0.087 (0.09 - -0.264)	-0.118 (0.021 - -0.257)	54.108 (-1138.529 - 1246.746)	-0.118 (0.021 - -0.257)	-0.155 (-0.138 - -0.171)	0.846 (-5.737 - 7.429)	-0.158 (-0.111 - -0.205)
